# Supplementary material for: The 5-minute Apgar score as a predictor of childhood cancer: a population-based cohort study in five million children
Source: PubMed Central journal article supplement — BMJ Open. 2012 Aug 8;2(4):e001095. doi: 10.1136/bmjopen-2012-001095 (PMC3425910; doi:10.1136/bmjopen-2012-001095), 2012-08-08
Supplement: bmjopen-2012-001095.draft_revisions.pdf [file bmjopen-2012-001095.draft_revisions.pdf]

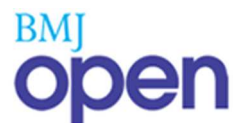

**The Five-minute Apgar Score as a Predictor of Childhood Cancer: a Study in Five Million Children**

|                                 |                                                                                                                                                                                                                                            |
|---------------------------------|--------------------------------------------------------------------------------------------------------------------------------------------------------------------------------------------------------------------------------------------|
| Journal:                        | <i>BMJ Open</i>                                                                                                                                                                                                                            |
| Manuscript ID:                  | bmjopen-2012-001095                                                                                                                                                                                                                        |
| Article Type:                   | Research                                                                                                                                                                                                                                   |
| Date Submitted by the Author:   | 01-Mar-2012                                                                                                                                                                                                                                |
| Complete List of Authors:       | Li, Jiong; Aarhus University, Public Health<br>Cnattingius, Sven<br>Gissler, M; THL National Institute for Health and Welfare, Information<br>VESTERGAARD, Mogens<br>Obel, Carsten<br>AHRENSBERG, Jette<br>Olsen, Jørn; Aarhus University, |
| <b>Primary Subject Heading</b>: | Epidemiology                                                                                                                                                                                                                               |
| Secondary Subject Heading:      | Epidemiology, Public health, Oncology, Reproductive medicine, obstetrics and gynaecology                                                                                                                                                   |
| Keywords:                       | Epidemiology < ONCOLOGY, Paediatric oncology < ONCOLOGY, PREVENTIVE MEDICINE                                                                                                                                                               |
|                                 |                                                                                                                                                                                                                                            |

SCHOLARONE™  
Manuscripts

Apgar score and childhood cancer, 01032012

**The five-minute Apgar score as a predictor of childhood cancer: a population-based cohort study in five million children**

Jiong Li, PhD<sup>1</sup> Sven Cnattingus, PhD<sup>2</sup> Mika Gissler, PhD<sup>3</sup> Mogens Vestergaard, PhD<sup>4,5</sup> Carsten Obel, PhD<sup>4</sup> Jette Ahrensberg, MD<sup>5</sup> Jørn Olsen, PhD<sup>1,6</sup>

<sup>1</sup> Section of Epidemiology, Department of Public Health, Aarhus University, Denmark

<sup>2</sup> Clinical Epidemiology Unit, Department of Medicine, Karolinska Institute, Sweden

<sup>3</sup> National Institute for Health and Welfare, Finland / Nordic School of Public Health, Sweden

<sup>4</sup> Section of General Practice, Department of Public Health, Aarhus University, Denmark

<sup>5</sup> Research Unit of General Practice, Department of Public Health, Aarhus University, Denmark

<sup>6</sup> Department of Epidemiology, School of Public Health, University of California, Los Angeles, USA

Correspondence to:

Jiong Li, MD, PhD

Section of Epidemiology, Department of Public Health, Aarhus University

Bartholins Alle 2, DK 8000 Aarhus C, Denmark

Tel: +45 8716 7972; Fax: +45 8613 1580; Email: [jl@soci.au.dk](mailto:jl@soci.au.dk)

Date of revision: 01 March 2012

Word count of text: 2288

Apgar score and childhood cancer, 01032012

## ABSTRACT

**Objective:** The etiology of childhood cancer remains largely unknown but recent research indicates that uterine environment plays an important role. We aimed to examine the association between the Apgar score at 5 minutes after birth and the risk of childhood cancer.

**Design:** Nationwide population-based cohort study

**Setting:** Nationwide register data in Denmark and Sweden

**Study population:** All live-born singletons born in Denmark from 1978 to 2006 (N=1,741,177) and in Sweden from 1973 to 2006 (N=3,319,621). Children were followed up from birth to 14 years of age.

**Main outcome measures:** Rates and hazard ratios (HRs) of all cancers and specific cancers.

**Results:** A total of 8697 children received a cancer diagnosis (1.7 per 1000). Compared to children with a 5-minute Apgar score of 9-10, children with a score of 0-5 had a 50% higher risk of cancer (adjusted hazard ratio (HR) 1.50, 95% confidence interval (CI) 1.19-1.89), whereas children with a score of 6-8 had a 14% higher risk (adjusted HR 1.14, 95% CI 1.02-1.28). These associations were not modified by country, sex, birth characteristics, and maternal factors. Children with a score of 0-5 had higher risks for most childhood cancers in general, but the confidence intervals for those estimates were often wide due to the small number of cases. The highest HR was 4.78 (95% CI 2.79- 8.19) for Wilms' tumor in children with an Apgar score of 0-5.

**Conclusions:** Our data shows that a low five-minute Apgar score was associated with a higher risk of childhood cancer, suggesting that environmental factors operating before or during delivery may play a causal role. In addition to as an assessment tool for a newborn's clinical status, the Apgar score at 5 minutes may also indicate programming effect of fetal environment on diseases in later life, including childhood cancer.

**Key words** the Apgar score at 5 minutes, cohort, developmental origins of disease, childhood cancer.

## INTRODUCTION

Childhood cancer is the second leading cause of deaths in children in high income countries, and it is of major concern for patients, families, and societies.<sup>1,2</sup> In spite of extensive research, little is known about the etiology of childhood cancer.<sup>1,2</sup> Almost half of childhood cancers are diagnosed before 5 year of age,<sup>1</sup> indicating that some causal factors operate in utero or in early postnatal life.<sup>3,4</sup> However, only few such risk factors have been identified.<sup>5</sup> Birth characteristics may represent the interactions between genetic susceptibility and prenatal environmental causes of cancer,<sup>6-8</sup> but the empirical evidence available to date is inconsistent and inconclusive.<sup>6-9</sup>

The Apgar score is assigned to virtually every newborn, which evaluates the clinical state of the newborns based on five physical signs (heart rate, respiratory effort, reflex irritability, muscle tone, and color) present shortly after birth.<sup>10</sup> A total score of 9 or 10 indicates that the baby is ‘in its best possible condition’.<sup>10</sup> Although the usefulness of the Apgar score has been questioned in recent years,<sup>11</sup> this scoring system remains the only widely used and accepted tool for assessing the vitality of newborn infants across the world.<sup>12,13</sup> The five-minute Apgar score is a predictor of neonatal mortality,<sup>14</sup> and several neurological outcomes.<sup>15-19</sup> A suboptimal fetal environment<sup>20</sup> related to a low Apgar score may also be associated with compromised immune responses against tumors,<sup>21</sup> which can predict long-term human health,<sup>22,23</sup> including future cancer risk.

In this population-based cohort study, we examined the association between the Apgar score at five minutes of age and childhood cancer, after taking into account other birth characteristics,<sup>8,24</sup> maternal socio-demographic characteristics,<sup>1,2</sup> and maternal smoking during pregnancy.<sup>25,26</sup> We hypothesized that children with a low Apgar score have a higher risk of childhood cancer than children with a full Apgar score.<sup>21</sup>

## METHODS

### Study design and study population

Data from eight national registers in Sweden and Denmark were linked by the unique personal identification number, which is assigned to each resident in the Scandinavian countries.<sup>27</sup> This population-based cohort study<sup>28</sup> include all singleton children born in Denmark from 1978 to 2006 (N=1,741,177) and in Sweden from 1973 to 2006 (N=3,319,621). Children were followed from birth until a cancer diagnosis, death, emigration, 14 years of age, or end of follow up (December 31<sup>st</sup>, 2006 in Sweden, December 31<sup>st</sup>, 2007 in Denmark), whichever came first.

The Apgar score at 5 minutes of age and other birth characteristics (gestational age, birth weight, etc) were retrieved from Medical Birth Registers (MBR) in Denmark and in Sweden. The Danish Medical Birth Register was established in 1968<sup>29</sup> and the Swedish Medical Birth Register in 1973([http://www.socialstyrelsen.se/Lists/Artikelkatalog/Attachments/10655/2003-112-3\\_20031123.pdf](http://www.socialstyrelsen.se/Lists/Artikelkatalog/Attachments/10655/2003-112-3_20031123.pdf)). These registers include data on practically all deliveries in Denmark and Sweden, respectively, and the information is collected from medical records in prenatal, delivery and neonatal care. It is compulsory for every health care provider to report to the registers.<sup>30</sup>

Socio-demographic factors were obtained from the Danish Integrated Database for Longitudinal Labor Market Research (IDA), the Danish Civil Registry System, the Swedish Education Registry, and the Swedish Registry of Population and Population Changes.<sup>28</sup>

### Outcome measurements

Data on cancer was obtained from national cancer registries, and the registration and coding practices have been described elsewhere.<sup>31,32</sup> The main outcomes of interest were all incident cancers (ICD-7

Apgar score and childhood cancer, 01032012

codes 104-205, ICD-10 codes C00-97), and the most frequent childhood cancers: <sup>3,4</sup> leukemia (ICD-7 code 204, ICD-10 codes C91-95), Hodgkin's lymphoma (ICD-7 code 201, ICD-10 code C81), non-Hodgkin's lymphoma (ICD-7 codes 200, 202, ICD-10 codes C82-83), Hepatic tumors (ICD-7 code 155, ICD-10 code C22), Testis cancer (ICD-7 code 178, ICD-10 code C62), Wilm's tumor (ICD-7 code 180 and PAD 886, ICD-10 code C64.9), retinoblastoma of the eye (ICD-7 code 192 and PAD 436, ICD-10 code C69.2), and central nervous system (CNS) tumors (ICD-7 code 193, ICD-10 codes C70-71).

### Statistical analysis

All data handling and statistical analyses were performed using SAS version 9.2 statistical software package (SAS Institute, Inc., Cary, North Carolina). The low Apgar score was categorized into each single score and also into 2 subgroups (0-5 and 6-8), as a very low score would be different from a score of over 5. <sup>10</sup> Hazards ratios with 95% confidence intervals were estimated by Cox regression with the PHREG procedure. Potential confounders were included in the model, such as country, child sex (male, female) and birth characteristics ((parity (1, 2,  $\geq 3$ ), birth weight (<2500 g, 2500-3249 g, 3250-3999 g, and  $\geq 4000$  g), gestational age (<37 weeks and  $\geq 37$  weeks)), maternal factors ((age ( $\leq 26$  years, 27-30 years, and  $\geq 31$  years), education level (low:  $\leq 9$  years, middle: 10-14 years, and high:  $\geq 15$  years) (available Swedish data from 1990, 1995, 2000, and 2005, available annual Danish data from 1978-2006<sup>29</sup>), smoking during pregnancy (yes, no) (available 1991-2007 in Denmark and 1983-2006 in Sweden)).

Analyses were also stratified by country, sex, birth weight, gestational age, and parity, which have been suggested to be associated with both Apgar score and cancer risk. <sup>1,2</sup> Analyses were also performed for the sub-cohorts where information on maternal smoking was available.

## RESULTS

The baseline characteristics of the study population (5,061,798 singletons) are shown in Table 1 according to the 3 subgroups of Apgar scores (0 to 5, 6-8, and 9-10). Low Apgar scores were more common among boys, first-born children, children born preterm or with low birth weight, children born to mothers with lower education or to mothers who smoked during pregnancy.

A total of 8697 children were diagnosed with cancer before 14 years of age (1.7 per 1000 children). Table 2 presents that children with a score of 0 to 5 had a higher overall rate of childhood cancer (2.3 per 1000) than those with a score of 6 to 8 (2.0 per 1000), and those with a score of 9 to 10 (1.7 per 1000). Compared to children with a five-minute Apgar score of 9-10, children with a score of 0-5 had a 50% increased risk of cancer before 14 years of age (adjusted Hazard ratio (HR) 1.50, 95% confidence interval (CI) 1.19-1.89), and children with a score of 6-8 had a 14% increased risk (HR 1.14, 95% CI 1.02-1.28).

Table 3 shows that the HRs in children with a score of 0-5 were higher in almost all strata, according to country, child's sex and birth characteristics (birth weight, gestational age, and birth order), and maternal factors (age, education, and smoking status during pregnancy).

Compared to children with a score of 9-10, children with a score of 0-5 had higher risks for several main childhood cancers (CNS tumors, retinoblastoma, hepatic tumors, bone tumors, and testicular tumors), but most estimates were not statistically significant (Table 4). Low Apgar scores did not influence risks of lymphatic / hemopoietic neoplasms. The highest HR was observed in children with a score of 0-5 for Wilms' tumor (HR 4.78, 95% CI 2.79-8.19).

## DISCUSSION

Children with a low 5-minute Apgar score, especially children with a score of 0 to 5, had a higher overall risk of childhood cancer and higher risks for several main childhood cancers. The association was independent of country, child sex, child birth characteristics (birth weight, birth order, and gestational age), and maternal factors (age, education, and smoking during pregnancy). Similar associations were seen for most childhood cancers, albeit the estimate was only statistically significant for Wilms' tumor. However, we found no association between low Apgar score and risk of leukemia and other lymphatic / hemopoietic malignancies.

The theory of 'developmental-origins of health and disease' proposes the importance of in utero environment in long term human health.<sup>22, 23</sup> We observed that children with any Apgar score between 0 and 8 at 5 minutes, especially those with a score of 0 to 5, had a higher overall cancer risk than those with an optimal score of 9 to 10. The mechanism underlying this observation is, however, unclear. It should be noted that the Apgar score is a sum of 5 signs (rating 0 to 2), which are not of equal value.<sup>10, 13</sup> A low Apgar score is a marker of the factors that prevent the child from achieving a high score, or a suboptimal fetal environment<sup>20</sup> that may have a programming effect on the development of childhood cancer. While in utero exposures to insulin-like growth factors,<sup>8</sup> estrogens,<sup>33, 34</sup> or infections<sup>24, 35</sup> have been proposed to explain the relationships between most of other birth outcomes and childhood cancer, different biological pathways may operate for the association between the Apgar score and childhood cancer. It can also be hypothesized that neonatal treatments related to low Apgar scores may increase the risk of some childhood cancers.<sup>36, 37</sup>

The observed associations between low Apgar scores and childhood cancer risk were not explained by the role of other adverse birth outcomes, which have been widely used as the proxy



Apgar score and childhood cancer, 01032012

1  
2  
3  
4 indicators of fetal environment to explain fetal origins for a number of adult diseases.<sup>22, 23</sup> As expected,  
5  
6 a low Apgar score was more common among children with adverse birth outcomes, which often  
7  
8 correlate with childhood cancer.<sup>6-9</sup> However, the elevated risks related to a low score were observed  
9  
10 in almost all subgroups, not restricted to adverse birth outcomes. Furthermore, the associations were  
11  
12 consistent according to country and maternal factors under investigation.  
13  
14

15  
16 The best evidence for fetal origins of childhood cancer has been available for leukemia.<sup>6-8</sup> But  
17  
18 our findings suggest that those observations may operate through the mechanisms that do not affect the  
19  
20 Apgar score. Similar interpretations apply to other lymphatic / hemopoietic neoplasms, and CNS  
21  
22 tumors. The associations between a low Apgar score and several specific childhood cancers in our  
23  
24 study are noteworthy. For example, the highest risk of a low Apgar score was obtained for Wilms  
25  
26 tumor, which is in line with observations in two register-based studies (restricted to only girls in one of  
27  
28 the studies)<sup>38, 39</sup> but not in another case-control study.<sup>40</sup> Hypoxia, as indicated by a low score, may  
29  
30 result in cell damage that subsequently leads to Wilms tumor.<sup>41, 42</sup> Alternatively, neonatal treatments  
31  
32 provided to neonates with a low Apgar score may also increase the risk of Wilms tumor.<sup>36, 37</sup>  
33  
34 Hepatoblastoma is reported to be associated with factors like low birth weight,<sup>43</sup> smoking during  
35  
36 pregnancy or young maternal age.<sup>44</sup> A recent study showed a reverse association between birth order  
37  
38 and retinoblastoma.<sup>9</sup> However, the observed elevated risks of both hepatoblastoma and retinoblastoma  
39  
40 after adjustment might indicate an independent role of a low Apgar score for these two childhood  
41  
42 cancers.  
43  
44  
45  
46  
47

48  
49 The most important strengths of our study include singletons in a prospectively longitudinal  
50  
51 design, large sample size, complete follow up, and detailed data on other covariates. The rarity of  
52  
53 childhood cancer makes population-based epidemiological studies very difficult. Much of the  
54  
55 heterogeneity of previous results might be due to the small sample sizes and lack of control for both  
56  
57  
58  
59  
60

Apgar score and childhood cancer, 01032012

1  
2  
3  
4 factors related to the child and the mother. Our data enabled us to do more in-depth investigation by  
5  
6 examining the risks in subgroups. The cohort design based on prospectively collected high quality data  
7  
8 minimized the impact of information bias or recall bias. The registry system in the Nordic countries  
9  
10 provides both a complete case ascertainment and accurate linkage with other data, which allow  
11  
12 complete follow up with least impact of misclassification error.<sup>27</sup>  
13  
14  
15

16 One limitation of our study is that we lack information on risk factors after birth. However,  
17  
18 factors associated with a low Apgar score, such as related neonatal treatments, may lie in the pathways  
19  
20 between exposure and outcome, and should not necessarily be controlled for in the analyses.<sup>45</sup> Second  
21  
22 limitation is that we cannot rule out the confounding of factors like environmental exposures after  
23  
24 birth. Thirdly, the case numbers for several childhood cancers are small, although the total population  
25  
26 included over 5 million children.  
27  
28  
29

30 To conclude, our findings support the developmental-origins hypothesis of childhood cancer.  
31  
32 An association between a low Apgar score and childhood cancer does not prove a causal role of the  
33  
34 components that make up the Apgar score but it will further strengthen the relevance of viewing the  
35  
36 prenatal time period as a causal time window of interest. A low Apgar score may reflect a pathologic  
37  
38 pregnancy which could share causes with childhood cancers, or childhood cancers may have a clinical  
39  
40 onset that starts during fetal life. In the first situation, a low Apgar score may also be associated with  
41  
42 cancer risk in adulthood. In addition to being a widely accepted assessment tool in neonatal care, the  
43  
44 Apgar score may indicate programming effects of fetal environment on further health, suggesting that  
45  
46 its role in clinical practice and public health may reach beyond its current use.  
47  
48  
49  
50  
51  
52  
53

54 **Funding** This work was supported by a grant to Dr. Jiong Li from the European Research Council  
55  
56 (ERC-2010-StG no. 260242, the European Union Seventh Framework Programme (EU FP7)); and the  
57  
58  
59  
60

Apgar score and childhood cancer, 01032012

Nordic Cancer Union (2008); and the NordForsk (070331); the Danish Medical Research Council (projects no. 09-060229, 09-063494, and 09-072986); and the Swedish Council for Working Life and Social Research (Grant no. 2010-0092).

**Competing Interests** None.

**Contributors** JL conceived the research, analysed the data and wrote the first draft of the manuscript.

JL, SC, MG, MV, CO, JA, and JO contributed to data analysis, interpretation of results, and critical revision of the manuscript. All authors approved the final manuscript.

**Ethics approval** The study was approved by Danish Data Protection Agency (j nr. 2008-41-2680), Scientific Ethics Committee of Central Region Jylland (VEK, sagnr. M-20100252), Research Ethics Committee (EPN) at Karolinska Institutet (Ref no. 2008 /4:6).

**Patient consent** not needed for register-based research according to laws in Denmark and Sweden.

**Provenance and peer review** Not commissioned; externally peer reviewed.

**Data sharing statement** There are no additional data available.

## ARTICLE SUMMARY

**Article focus**

- The etiology of childhood cancer remains largely unknown but recent research indicates that uterine environment plays an important role.
- The Apgar score may have more implications than its role in current clinical practice

**Key messages**

- A low five-minute Apgar score was associated with a higher risk of childhood cancer, suggesting that environmental factors operating before or during delivery may play a causal role.
- In addition to as an assessment tool for a newborn's clinical status, the Apgar score at 5 minutes may also indicate programming effect of fetal environment on diseases in later life, including childhood cancer.

**Strengths and limitation of this study**

- The most important strengths of our study include singletons in a prospectively longitudinal design, large sample size of 5 million, complete follow up, accurate data on exposure and outcome, and detailed data on covariates.
- The limitations of our study are that we lack information on risk factors after birth and the case numbers for several childhood cancers are small.

**REFERENCES**

1. Kaatsch P. Epidemiology of childhood cancer. *Cancer Treat Rev* 2010;36:277-285.
2. Parkin DM, Whelan S, Ferlay J, Thomas DB. *Cancer Incidence in Five Continents VIII*. IARC Scientific Publications. 2002. Lyon, France, IARC.
3. Lucy M. Environmental genotoxicants/carcinogens and childhood cancer: Bridgeable gaps in scientific knowledge. *Mutation Research/Genetic Toxicology and Environmental Mutagenesis* 2006;608:136-156.
4. Gary L. An overview of children as a special population--Relevance to predictive biomarkers. *Toxicology and Applied Pharmacology* 2005;206:215-218.
5. Garner MJ, Turner MC, Ghadirian P, Krewski D. Epidemiology of testicular cancer: an overview. *Int J Cancer* 2005;116:331-339.
6. Greaves M. Molecular genetics, natural history and the demise of childhood leukaemia. *Eur J Cancer* 1999 Feb 1935;173-185.
7. Ma X, Metayer C, Does MB, Buffler PA. Maternal pregnancy loss, birth characteristics, and childhood leukemia (United States). *Cancer Causes Control* 2005;16:1075-1083.
8. Tower RL, Spector LG. The epidemiology of childhood leukemia with a focus on birth weight and diet. *Crit Rev Clin Lab Sci* 2007;44:203-242.
9. Von Behren J, Spector LG, Mueller BA et al. Birth order and risk of childhood cancer: A pooled analysis from five US States. *Int J Cancer* 2011;128:2709-2716.
10. APGAR V. A proposal for a new method of evaluation of the newborn infant. *Curr Res Anesth Analg* 1953;260-267.
11. No authors listed. Use and abuse of the Apgar score. Committee on Fetus and Newborn, American Academy of Pediatrics, and Committee on Obstetric Practice, American College of Obstetricians and Gynecologists. *Pediatrics* 1996;98:141-142.
12. Finster MMD, Wood MMD. The Apgar Score Has Survived the Test of Time. *Anesthesiology* 2005;102:855-857.
13. Papile LA. The Apgar Score in the 21st Century. *N Engl J Med* 2001;344:519-520.
14. Casey BM, McIntire DD, Leveno KJ. The Continuing Value of the Apgar Score for the Assessment of Newborn Infants. *N Engl J Med* 2001;344:467-471.
15. Li J, Olsen J, Vestergaard M, Obel C. Low Apgar Scores and Risk of Childhood Attention Deficit Hyperactivity Disorder. *J Pediatr* 2011;158:775-779.

## Apgar score and childhood cancer, 01032012

16. Moster D, Lie RT, Irgens LM, Bjerkedal T, Markestad T. The association of Apgar score with subsequent death and cerebral palsy: A population-based study in term infants. *J Pediatr* 2001;138:798-803.
17. Odd DE, Rasmussen F, Gunnell D, Lewis G, Whitelaw A. A cohort study of low Apgar scores and cognitive outcomes. *Arch Dis Child Fetal Neonatal Ed* 2008;93:F115-F120.
18. Stuart A, Olausson PO, Kallen K. Apgar scores at 5 minutes after birth in relation to school performance at 16 years of age. *Obstet Gynecol* 2011;118:201-208.
19. Sun Y, Vestergaard M, Pedersen CB, Christensen J, Olsen J. Apgar scores and long-term risk of epilepsy. *Epidemiology* 2006;17:296-301.
20. Gilstrap LC, III, Hauth JC, Hankins GD, Beck AW. Second-stage fetal heart rate abnormalities and type of neonatal acidemia. *Obstet Gynecol* 1987;70:191-195.
21. Ekbom A. The developmental environment and the early origins of cancer. In: Gluckman P, Hanson M, editors. *Developmental origins of health and disease*. Cambridge: Cambridge University Press; 2006:415-425.
22. Gluckman PD, Hanson MA. Living with the Past: Evolution, Development, and Patterns of Disease. *Science* 2004;305:1733-1736.
23. Gluckman PD, Hanson MA, Cooper C, Thornburg KL. Effect of In Utero and Early-Life Conditions on Adult Health and Disease. *N Engl J Med* 2008;359:61-73.
24. Greaves M. Childhood leukaemia. *BMJ* 2002;324:283-287.
25. Okasha M, McCarron P, Gunnell D, Smith GD. Exposures in childhood, adolescence and early adulthood and breast cancer risk--a systematic review of the literature. *Breast Cancer Res Treat* 2003 2003;78:223-276.
26. Park SK, Kang D, McGlynn KA et al. Intrauterine environments and breast cancer risk: meta-analysis and systematic review. *Breast Cancer Res* 2008;10:R8.
27. Frank L. Epidemiology. When an entire country is a cohort. *Science* 2000;287:2398-2399.
28. Li J, Vestergaard M, Obel C, Cnattingus S, Gissler M, Olsen J. Cohort Profile: The Nordic Perinatal Bereavement Cohort. *Int J Epidemiol* 2010;40:1161-1167.
29. Knudsen LB, Olsen J. The Danish Medical Birth Registry. *Dan Med Bull* 1998;45:320-323.
30. Axelsson O. The Swedish Medical Birth Register. *Acta Obstetrica et Gynecologica Scandinavica* 2003;82:491-492.
31. Barlow L, Westergren K, Holmberg L, Talback M. The completeness of the Swedish Cancer Register: a sample survey for year 1998. *Acta Oncol* 2009;48:27-33.

## Apgar score and childhood cancer, 01032012

32. Gjerstorff ML. The danish cancer registry. *Scand J Public Health* 2011;39:42-45.
33. Petridou E, Panagiotopoulou K, Katsouyanni K, Spanos E, Trichopoulos D. Tobacco smoking, pregnancy estrogens, and birth weight. *Epidemiology* 1990;1:247-250.
34. Liehr JG. Is estradiol a genotoxic mutagenic carcinogen? *Endocr Rev* 2000;21:40-54.
35. Law GR. Host, family and community proxies for infections potentially associated with leukaemia. *Radiat Prot Dosimetry* 2008;132:267-272.
36. Sadetzki S, Mandelzweig L. Childhood exposure to external ionising radiation and solid cancer risk. *Br J Cancer* 0 AD;100:1021-1025.
37. Spector LG, Klebanoff MA, Feusner JH, Georgieff MK, Ross JA. Childhood Cancer Following Neonatal Oxygen Supplementation. *J Pediatric* 2005;147:27-31.
38. Heuch JM, Heuch I, Kvale G. Birth characteristics and risk of Wilms' tumour: a nationwide prospective study in Norway. *Br J Cancer* 1996;74:1148-1151.
39. Schuz J, Schmidt LS, Kogner P et al. Birth characteristics and Wilms tumors in children in the Nordic countries: A register-based case-control study. *Int J Cancer* 2011;128:2166-2173.
40. Puumala SE, Soler JT, Johnson KJ, Spector LG. Birth characteristics and Wilms tumor in Minnesota. *Int J Cancer* 2008;122:1368-1373.
41. Ruan K, Song G, Ouyang G. Role of hypoxia in the hallmarks of human cancer. *J Cell Biochem* 2009;107:1053-1062.
42. Rankin EB, Giaccia AJ. The role of hypoxia-inducible factors in tumorigenesis. *Cell Death Differ* 2008;15:678-685.
43. Reynolds P, Urayama KY, Von Behren J, Feusner J. Birth characteristics and hepatoblastoma risk in young children. *Cancer* 2004;100:1070-1076.
44. McLaughlin CC, Baptiste MS, Schymura MJ, Nasca PC, Zdeb MS. Maternal and Infant Birth Characteristics and Hepatoblastoma. *Am J Epidemiol* 2006;163:818-828.
45. Rothman KJ, Greenland S, Lash TL. *Modern Epidemiology*. Third ed. Philadelphia: Lippincott Williams & Wilkins; 2008.

Apgar score and childhood cancer, 01032012

**Table 1. Baseline characteristics of the study population according to the Apgar score \***

| Variables               | Apgar score at 5 minutes |              |                |              |
|-------------------------|--------------------------|--------------|----------------|--------------|
|                         | 0-5                      | 6-8          | 9-10           | Unknown      |
| <b>Country</b>          |                          |              |                |              |
| Denmark                 | 10,677 (32)              | 42,151 (27)  | 1,670,475 (36) | 19,874 (8)   |
| Sweden                  | 22,698 (68)              | 116,177 (73) | 2,951,093 (64) | 229,653 (92) |
| <b>Sex</b>              |                          |              |                |              |
| Boys                    | 18,834 (56)              | 90,003 (57)  | 2,366,258 (51) | 126,014 (51) |
| Girls                   | 14,540 (44)              | 68,325 (43)  | 2,255,310 (49) | 122,513 (49) |
| <b>Birth order</b>      |                          |              |                |              |
| 1                       | 16,915 (51)              | 91,222 (58)  | 1,971,289 (43) | 100,242 (40) |
| 2                       | 9389 (28)                | 42,300 (27)  | 1,695,084 (37) | 93,232 (38)  |
| ≥3                      | 5783 (17)                | 23,099 (15)  | 984,716 (19)   | 448,407 (19) |
| Unknown                 | 1288 (4)                 | 1707 (1)     | 60,479 (1)     | 6646 (3)     |
| <b>Gestational age</b>  |                          |              |                |              |
| <37 weeks               | 8903 (27)                | 27,348 (17)  | 191,587 (4)    | 14,441 (6)   |
| ≥37 weeks               | 22,997 (69)              | 129,270 (82) | 4,368,538 (95) | 226,676 (91) |
| Unknown                 | 1475 (4)                 | 1710 (1)     | 61,443 (1)     | 7410 (3)     |
| <b>Birth weight (g)</b> |                          |              |                |              |
| <2500                   | 8240 (25)                | 22,495 (14)  | 135,925 (3)    | 11,152 (4)   |
| 2500-3249               | 7766 (23)                | 39,838 (25)  | 1,137,533 (25) | 62,402 (25)  |
| 3250-3999               | 10,998 (33)              | 65,683 (41)  | 2,448,948 (53) | 128,269 (52) |



## Apgar score and childhood cancer, 01032012

|                                                      |             |             |                |              |
|------------------------------------------------------|-------------|-------------|----------------|--------------|
| >=4000                                               | 4341 (13)   | 27,742 (18) | 833,578 (18)   | 37,499 (15)  |
| Unknown                                              | 2030 (6)    | 2570 (2)    | 65,584 (1)     | 9205 (4)     |
| <b>Maternal age</b>                                  |             |             |                |              |
| <=26                                                 | 12,939 (39) | 60,066 (38) | 1,690,935 (37) | 120,974 (49) |
| 27-30                                                | 9295 (28)   | 45,174 (29) | 1,378,188 (30) | 68,491 (28)  |
| ≥31                                                  | 11,137 (33) | 53,076 (34) | 1,552,180 (34) | 59,023 (24)  |
| Unknown                                              | 4 (<1)      | 12 (<1)     | 265 (<1)       | 39 (<1)      |
| <b>Maternal education (years)</b>                    |             |             |                |              |
| Low (≤9)                                             | 16,349 (49) | 72,598 (46) | 2,006,645 (43) | 146,227 (59) |
| Middle (10-14)                                       | 8775 (26)   | 45,018 (28) | 1,297,059 (28) | 52,047 (21)  |
| High (≥15)                                           | 5600 (17)   | 28,130 (18) | 908,454 (20)   | 36,363 (15)  |
| Unknown                                              | 2651 (8)    | 12,582 (8)  | 409,410 (9)    | 13,890 (6)   |
| <b>Maternal smoking during pregnancy<sup>†</sup></b> |             |             |                |              |
| Yes                                                  | 4756 (22)   | 21,260 (18) | 633,236 (19)   | 10,937 (21)  |
| No                                                   | 14,667 (62) | 85,130 (73) | 2,419,935 (74) | 32,305 (61)  |
| Unknown                                              | 2385 (11)   | 9517 (8)    | 222,604 (7)    | 9968 (19)    |

\* Value is n (%). Study population includes all 5,061,798 singletons born in Denmark 1978-2006 and born in Sweden 1973-2006.

<sup>†</sup> Smoking status is available for 1991-2006 in Denmark and for 1983-2006 in Sweden.

05012012

**Table 2. Hazard Ratios (HRs) for childhood cancer according to the Apgar score at 5 minutes.**

| <b>Apgar score</b>  | <b>Cases (rate per 1000)</b> | <b>Crude HR</b>           | <b>Adjusted HR (95%CI) *</b> | <b>Adjusted HR 95%CI) †</b> |
|---------------------|------------------------------|---------------------------|------------------------------|-----------------------------|
| <b>0</b>            | 3 (0.7)                      | 0.44 (0.14-1.36) ‡        | 0.47 (0.15-1.45) ‡           | 0.46 (0.15-1.43) ‡          |
| <b>1</b>            | 15 (2.9)                     | 2.28 (1.38-3.78) ‡        | 2.20 (1.32-3.65) ‡           | 2.15 (1.30-3.57) ‡          |
| <b>2</b>            | 7 (2.3)                      | 1.47 (0.61-3.54)          | 1.44 (0.60-3.45)             | 1.37 (0.57-3.29)            |
| <b>3</b>            | 11 (2.6)                     | 2.13 (1.18-3.84) ‡        | 2.06 (1.14-3.72) ‡           | 1.96 (1.08-3.54) ‡          |
| <b>4</b>            | 14 (2.2)                     | 1.52 (0.88-2.61)          | 1.48 (0.86-2.54)             | 1.41 (0.82-2.42)            |
| <b>5</b>            | 26 (2.5)                     | 1.65 (1.11-2.44) ‡        | 1.62 (1.10-2.40) ‡           | 1.56 (1.05-2.31) ‡          |
| <b>0-5 combined</b> | <b>76 (2.3)</b>              | <b>1.57 (1.25-1.98) ‡</b> | <b>1.56 (1.23-1.96) ‡</b>    | <b>1.50 (1.19-1.89) ‡</b>   |
| <b>6</b>            | 34 (1.8)                     | 1.17 (0.84-1.64)          | 1.15 (0.82-1.34)             | 1.10 (0.78-1.54)            |
| <b>7</b>            | 67 (1.8)                     | 1.07 (0.84-1.37)          | 1.05 (0.82-1.34)             | 1.01 (0.79-1.29)            |
| <b>8</b>            | 208 (2.1)                    | 1.26 (1.10-1.45) ‡        | 1.23 (1.07-1.42) ‡           | 1.20 (1.04-1.38) ‡          |
| <b>6-8 combined</b> | <b>309 (2.0)</b>             | <b>1.21 (1.07-1.35) ‡</b> | <b>1.18 (1.05-1.32)</b>      | <b>1.14 (1.02-1.28)</b>     |
| <b>9-10</b>         | <b>7765 (1.7)</b>            | <b>1.0 (ref)</b>          | <b>1.0 (ref)</b>             | <b>1.0 (ref)</b>            |

\*Adjusted for country, sex, and maternal factors at child birth (age, education, and smoking during pregnancy).

05012012

1  
2  
3 †Adjusted for country, sex, maternal factors at child birth (age, education, and smoking during pregnancy), and birth  
4 characteristics of the child (birth weight, gestational age, birth order).  
5  
6

7 ‡ P<0.05.  
8  
9

10  
11  
12  
13  
14  
15  
16  
17  
18  
19  
20  
21  
22  
23  
24  
25  
26  
27  
28  
29  
30  
31  
32  
33  
34  
35  
36  
37  
38  
39  
40  
41  
42  
43  
44  
45  
46  
47  
48  
49

For peer review only

05012012

**Table 3. Hazard Ratios (HRs) for childhood cancer according to the Apgar score at 5 minutes, stratified on country, birth characteristics and maternal variables.**

| Variable    | Apgar score | Cancer cases (rate, per 1000) | Crude HR* (95%CI) | Adjusted HR† (95%CI) |                   |                   |
|-------------|-------------|-------------------------------|-------------------|----------------------|-------------------|-------------------|
| Country     | Denmark     | 1-5                           | 20 (1.9)          | 1.57 (1.25-1.98)‡    | 1.52 (1.23-1.91)‡ |                   |
|             |             | 6-8                           | 72 (1.7)          | 1.21 (1.07-1.35)‡    | 1.16 (1.03-1.30)‡ |                   |
|             |             | 9-10                          | 2461 (1.5)        | 1.0 (ref)            | 1.0 (ref)         |                   |
|             | Sweden      | 1-5                           | 56 (2.5)          | 1.65 (1.26-2.15)‡    | 1.60 (1.23-2.09)‡ |                   |
|             |             | 6-8                           | 237 (2.0)         | 1.26 (1.06-1.38)‡    | 1.16 (1.02-1.33)‡ |                   |
|             |             | 9-10                          | 5304 (1.8)        | 1.0 (ref)            | 1.0 (ref)         |                   |
|             | Sex         | Male                          | 1-5               | 44 (2.6)             | 1.54 (1.13-2.08)‡ | 1.46 (1.07-1.99)‡ |
|             |             |                               | 6-8               | 169 (1.9)            | 1.09 (0.94-1.28)  | 1.04 (0.89-1.22)  |
|             |             |                               | 9-10              | 4232 (1.8)           | 1.0 (ref)         | 1.0 (ref)         |
| Female      |             | 1-5                           | 32 (2.5)          | 1.60 (1.12-2.29)‡    | 1.55 (1.08-2.23)‡ |                   |
|             |             | 6-8                           | 140 (2.0)         | 1.35 (1.14-1.60)‡    | 1.29 (1.09-1.53)‡ |                   |
|             |             | 9-10                          | 3533 (1.6)        | 1.0 (ref)            | 1.0 (ref)         |                   |
| Birth order | 1           | 1-5                           | 38 (2.5)          | 1.45 (1.04-2.02)‡    | 1.38 (0.99-1.93)  |                   |

05012012

|                        |           |      |            |                               |                               |
|------------------------|-----------|------|------------|-------------------------------|-------------------------------|
|                        |           | 6-8  | 174 (2.0)  | 1.14 (0.98-1.33)              | 1.10 (0.94-1.28)              |
|                        |           | 9-10 | 3385 (1.6) | 1.0 (ref)                     | 1.0 (ref)                     |
|                        | 2         | 1-5  | 16 (1.7)   | 1.28 (0.78-2.09)              | 1.18 (0.72-1.93)              |
|                        |           | 6-8  | 72 (1.7)   | 1.08 (0.85-1.36)              | 0.99 (0.78-1.26)              |
|                        |           | 9-10 | 2797 (1.7) | 1.0 (ref)                     | 1.0 (ref)                     |
|                        | 3         | 1-5  | 16 (2.8)   | 2.11 (1.29-3.46) <sup>‡</sup> | 2.13 (1.29-3.49) <sup>‡</sup> |
|                        |           | 6-8  | 59 (2.6)   | 1.63 (1.26-2.12) <sup>‡</sup> | 1.60 (1.23-2.09) <sup>‡</sup> |
|                        |           | 9-10 | 1480 (1.7) | 1.0 (ref)                     | 1.0 (ref)                     |
| <b>Gestational age</b> | <37 weeks | 1-5  | 17 (1.9)   | 1.53 (1.16-2.00) <sup>‡</sup> | 1.48 (1.13-1.94) <sup>‡</sup> |
|                        |           | 6-8  | 63 (2.6)   | 1.16 (1.02-1.32) <sup>‡</sup> | 1.12 (0.99-1.28)              |
|                        |           | 9-10 | 353 (1.8)  | 1.0 (ref)                     | 1.0 (ref)                     |
|                        | ≥37 weeks | 1-5  | 57 (2.5)   | 1.74 (1.07-2.84) <sup>‡</sup> | 1.71 (1.04-2.79) <sup>‡</sup> |
|                        |           | 6-8  | 244 (1.9)  | 1.34 (1.02-1.75) <sup>‡</sup> | 1.30 (0.99-1.71)              |
|                        |           | 9-10 | 7304 (1.7) | 1.0 (ref)                     | 1.0 (ref)                     |
| <b>Birth weight</b>    | <2500 g   | 1-5  | 13 (1.6)   | 1.65 (0.94-2.88)              | 1.52 (0.86-2.66)              |
|                        |           | 6-8  | 46 (2.0)   | 1.32 (0.96-1.81)              | 1.20 (0.87-1.65)              |
|                        |           | 9-10 | 235 (1.7)  | 1.0 (ref)                     | 1.0 (ref)                     |

05012012

|                     |            |      |            |                               |                               |
|---------------------|------------|------|------------|-------------------------------|-------------------------------|
|                     | 2500-3249g | 1-5  | 18 (2.3)   | 1.54 (0.95-2.48)              | 1.50 (0.93-2.41)              |
|                     |            | 6-8  | 88 (2.2)   | 1.39 (1.12-1.73) <sup>‡</sup> | 1.33 (1.07-1.66) <sup>‡</sup> |
|                     |            | 9-10 | 1802 (1.6) | 1.0 (ref)                     | 1.0 (ref)                     |
|                     | 3250-3999g | 1-5  | 28 (2.5)   | 1.56 (1.07-2.28) <sup>‡</sup> | 1.51 (1.04-2.21) <sup>‡</sup> |
|                     |            | 6-8  | 126 (1.9)  | 1.20 (1.00-1.43) <sup>‡</sup> | 1.15 (0.96-1.37)              |
|                     |            | 9-10 | 4079 (1.7) | 1.0 (ref)                     | 1.0 (ref)                     |
|                     | ≥4000 g    | 1-5  | 10 (2.3)   | 1.22 (0.63-2.34)              | 1.18 (0.61-2.26)              |
|                     |            | 6-8  | 44 (1.6)   | 0.89 (0.66-1.20)              | 0.86 (0.63-1.16)              |
|                     |            | 9-10 | 1536 (1.8) | 1.0 (ref)                     | 1.0 (ref)                     |
| <b>Maternal age</b> | ≤26        | 1-5  | 30 (2.3)   | 1.50 (1.04-2.18) <sup>‡</sup> | 1.42 (0.98-2.06)              |
|                     |            | 6-8  | 114(1.9)   | 1.09 (0.90-1.31)              | 1.03 (0.85-1.25)              |
|                     |            | 9-10 | 3051 (1.8) | 1.0 (ref)                     | 1.0 (ref)                     |
|                     | 27-30      | 1-5  | 24 (2.6)   | 1.73 (1.14-2.64) <sup>‡</sup> | 1.73 (1.13-2.63) <sup>‡</sup> |
|                     |            | 6-8  | 101(2.2)   | 1.42 (1.16-1.73) <sup>‡</sup> | 1.39 (1.13-1.70) <sup>‡</sup> |
|                     |            | 9-10 | 2271 (1.6) | 1.0 (ref)                     | 1.0 (ref)                     |
|                     | ≥31        | 1-5  | 22 (2.0)   | 1.53 (1.01-2.33) <sup>‡</sup> | 1.42 (0.93-2.17)              |
|                     |            | 6-8  | 94 (1.8)   | 1.17 (0.95-1.44)              | 1.08 (0.87-1.33)              |

05012012

|                           |        |      |            |                               |                               |
|---------------------------|--------|------|------------|-------------------------------|-------------------------------|
|                           |        | 9-10 | 2443 (1.6) | 1.0 (ref)                     | 1.0 (ref)                     |
| <b>Maternal education</b> | Low    | 1-5  | 43 (2.6)   | 1.77 (1.30-2.39) <sup>‡</sup> | 1.67 (1.23-2.27) <sup>‡</sup> |
|                           |        | 6-8  | 164 (2.3)  | 1.27 (1.08-1.49) <sup>‡</sup> | 1.20 (1.03-1.41) <sup>‡</sup> |
|                           |        | 9-10 | 3692 (1.8) | 1.0 (ref)                     | 1.0 (ref)                     |
|                           | Middle | 1-5  | 17 (1.9)   | 1.30 (0.80-2.13)              | 1.25 (0.76-2.06)              |
|                           |        | 6-8  | 62 (1.4)   | 0.88 (0.68-1.13)              | 0.84 (0.65-1.08)              |
|                           |        | 9-10 | 2155 (1.7) | 1.0 (ref)                     | 1.0 (ref)                     |
|                           | High   | 1-5  | 8 (1.4)    | 1.57 (1.22-2.02) <sup>‡</sup> | 1.48 (1.15-1.92) <sup>‡</sup> |
|                           |        | 6-8  | 64 (2.3)   | 0.97 (0.46-2.04)              | 0.95 (0.45-2.01)              |
|                           |        | 9-10 | 1357 (1.5) | 1.0 (ref)                     | 1.0 (ref)                     |
| <b>Maternal smoking</b>   | Yes    | 1-5  | 6 (1.3)    | 0.89 (0.40-1.99)              | 0.86 (0.38-1.92)              |
|                           |        | 6-8  | 48 (2.3)   | 1.36 (1.02-1.82) <sup>‡</sup> | 1.28 (0.96-1.72)              |
|                           |        | 9-10 | 1074 (1.7) | 1.0 (ref)                     | 1.0 (ref)                     |
|                           | No     | 1-5  | 40 (2.7)   | 2.10 (1.53-2.88) <sup>‡</sup> | 2.07 (1.51-2.85) <sup>‡</sup> |
|                           |        | 6-8  | 144 (1.7)  | 1.17 (0.99-1.38)              | 1.10 (0.93-1.30)              |
|                           |        | 9-10 | 3629 (1.5) | 1.0 (ref)                     | 1.0 (ref)                     |

\*Crude analysis.

05012012

† Adjusted for country, sex, maternal factors (age, education, and smoking during pregnancy), and birth characteristics of the child (birth weight, gestational age, and birth order).

‡ P<0.05.

For peer review only

1  
2  
3  
4  
5  
6  
7  
8  
9  
10  
11  
12  
13  
14  
15  
16  
17  
18  
19  
20  
21  
22  
23  
24  
25  
26  
27  
28  
29  
30  
31  
32  
33  
34  
35  
36  
37  
38  
39  
40  
41  
42  
43  
44  
45  
46  
47  
48  
49



05012012

**Table 4. Hazard Ratios (HRs) for main childhood cancers according to the Apgar score at 5 minutes**

| Cancer type                  | Apgar score | Cancer cases (rate per 1000) | Crude HR (95% CI) | Adjusted HR* (95% CI) | Adjusted HR† (95% CI) |
|------------------------------|-------------|------------------------------|-------------------|-----------------------|-----------------------|
| <b>Leukemia</b>              | 0-5         | 13 (0.4)                     | 0.93 (0.54-1.64)  | 0.96 (0.55-1.65)      | 0.98 (0.57-1.69)      |
|                              | 6-8         | 85 (0.5)                     | 1.13 (0.91-1.41)‡ | 1.15 (0.93-1.43)      | 1.15 (0.93-1.43)      |
|                              | 9-10        | 2314 (0.5)                   | 1.0 (ref)         | 1.0 (ref)             | 1.0 (ref)             |
| <b>Hodgkin's disease</b>     | 0-5         | 0 (-)                        | -                 | -                     | -                     |
|                              | 6-8         | 2(<0.05)                     | 0.49 (0.12-1.99)  | 0.44 (0.11-1.76)      | 0.42 (0.10-1.71)      |
|                              | 9-10        | 126 (<0.05)                  | 1.0 (ref)         | 1.0 (ref)             | 1.0 (ref)             |
| <b>Non-Hodgkin's disease</b> | 0-5         | 3 (0.1)                      | 1.12 (0.36-3.49)  | 1.04 (0.33-3.23)      | 0.97 (0.31-3.02)      |
|                              | 6-8         | 10 (0.1)                     | 0.69 (0.37-1.29)  | 0.58 (0.31-1.09)      | 0.55 (0.29-1.03)      |
|                              | 9-10        | 449 (0.1)                    | 1.0 (ref)         | 1.0 (ref)             | 1.0 (ref)             |
| <b>CNS cancers</b>           | 0-5         | 20 (0.6)                     | 1.22 (0.76-1.96)  | 1.21 (0.75-1.94)      | 1.18 (0.73-1.90)      |
|                              | 6-8         | 104 (0.7)                    | 1.34 (1.10-1.63)‡ | 1.31 (1.08-1.60)‡     | 1.29 (1.06-1.58)‡     |
|                              | 9-10        | 2345 (0.5)                   | 1.0 (ref)         | 1.0 (ref)             | 1.0 (ref)             |
| <b>Retinblastoma</b>         | 0-5         | 3 (0.1)                      | 2.01 (0.64-6.27)  | 1.97 (0.63-6.14)      | 1.85 (0.59-5.80)      |
|                              | 6-8         | 9 (0.1)                      | 1.07 (0.55-2.07)  | 1.07 (0.55-2.08)      | 0.99 (0.50-1.93)      |

05012012

|                          |      |             |                               |                               |                               |
|--------------------------|------|-------------|-------------------------------|-------------------------------|-------------------------------|
|                          | 9-10 | 263 (0.1)   | 1.0 (ref)                     | 1.0 (ref)                     | 1.0 (ref)                     |
| <b>Wilms' tumor</b>      | 0-5  | 14 (0.4)    | 4.98 (2.93-8.47) <sup>‡</sup> | 4.92 (2.89-8.38) <sup>‡</sup> | 4.78 (2.79-8.19) <sup>‡</sup> |
|                          | 6-8  | 20 (0.1)    | 1.27 (0.81-1.99)              | 1.25 (0.80-1.96)              | 1.22 (0.78-1.91)              |
|                          | 9-10 | 484 (0.1)   | 1.0 (ref)                     | 1.0 (ref)                     | 1.0 (ref)                     |
| <b>Hepatoblastoma</b>    | 0-5  | 2 (0.1)     | 3.24 (0.80-13.12)             | 3.23 (0.80-13.07)             | 2.64 (0.65-10.86)             |
|                          | 6-8  | 5 (<0.05)   | 1.44 (0.59-3.53)              | 1.42 (0.58-3.49)              | 1.22 (0.49-3.02)              |
|                          | 9-10 | 107 (<0.05) | 1.0 (ref)                     | 1.0 (ref)                     | 1.0 (ref)                     |
| <b>Bone cancer</b>       | 0-5  | 3 (0.1)     | 2.00 (0.64-6.23)              | 2.03 (0.65-6.34)              | 1.87 (0.60-5.88)              |
|                          | 6-8  | 7 (<0.05)   | 0.88 (0.41-1.86)              | 0.89 (0.42-1.90)              | 0.85 (0.40-1.82)              |
|                          | 9-10 | 248 (0.1)   | 1.0 (ref)                     | 1.0 (ref)                     | 1.0 (ref)                     |
| <b>Testicular cancer</b> | 0-5  | 0 (0)       | -                             | -                             | -                             |
|                          | 6-8  | 5 (<0.05)   | 2.44 (0.98-6.07)              | 2.23 (0.90-5.55)              | 2.15 (0.86-5.42)              |
|                          | 9-10 | 64 (<0.05)  | 1.0 (ref)                     | 1.0 (ref)                     | 1.0 (ref)                     |

\* Adjusted for country, sex, and maternal factors at child birth (age, education, and smoking during pregnancy).

† Adjusted for country, sex, and maternal factors at child birth (age, education, and smoking during pregnancy), and birth characteristics of the child (birth weight, gestational age, and birth order).

‡ P<0.05.

**STROBE 2007 (v4) checklist of items to be included in reports of observational studies in epidemiology\***  
**Checklist for cohort, case-control, and cross-sectional studies (combined)**

| Section/Topic             | Item # | Recommendation                                                                                                                                                                                                                                                                                                                                                                                                                                                         | Reported on page # |
|---------------------------|--------|------------------------------------------------------------------------------------------------------------------------------------------------------------------------------------------------------------------------------------------------------------------------------------------------------------------------------------------------------------------------------------------------------------------------------------------------------------------------|--------------------|
| Title and abstract        | 1      | (a) Indicate the study's design with a commonly used term in the title or the abstract                                                                                                                                                                                                                                                                                                                                                                                 | 1                  |
|                           |        | (b) Provide in the abstract an informative and balanced summary of what was done and what was found                                                                                                                                                                                                                                                                                                                                                                    | 2                  |
| <b>Introduction</b>       |        |                                                                                                                                                                                                                                                                                                                                                                                                                                                                        |                    |
| Background/rationale      | 2      | Explain the scientific background and rationale for the investigation being reported                                                                                                                                                                                                                                                                                                                                                                                   | 3                  |
| Objectives                | 3      | State specific objectives, including any pre-specified hypotheses                                                                                                                                                                                                                                                                                                                                                                                                      | 3                  |
| <b>Methods</b>            |        |                                                                                                                                                                                                                                                                                                                                                                                                                                                                        |                    |
| Study design              | 4      | Present key elements of study design early in the paper                                                                                                                                                                                                                                                                                                                                                                                                                | 4                  |
| Setting                   | 5      | Describe the setting, locations, and relevant dates, including periods of recruitment, exposure, follow-up, and data collection                                                                                                                                                                                                                                                                                                                                        | 4                  |
| Participants              | 6      | (a) <i>Cohort study</i> —Give the eligibility criteria, and the sources and methods of selection of participants. Describe methods of follow-up<br><i>Case-control study</i> —Give the eligibility criteria, and the sources and methods of case ascertainment and control selection. Give the rationale for the choice of cases and controls<br><i>Cross-sectional study</i> —Give the eligibility criteria, and the sources and methods of selection of participants | 4                  |
|                           |        | (b) <i>Cohort study</i> —For matched studies, give matching criteria and number of exposed and unexposed<br><i>Case-control study</i> —For matched studies, give matching criteria and the number of controls per case                                                                                                                                                                                                                                                 | Not applicable     |
| Variables                 | 7      | Clearly define all outcomes, exposures, predictors, potential confounders, and effect modifiers. Give diagnostic criteria, if applicable                                                                                                                                                                                                                                                                                                                               | 4,5                |
| Data sources/ measurement | 8*     | For each variable of interest, give sources of data and details of methods of assessment (measurement). Describe comparability of assessment methods if there is more than one group                                                                                                                                                                                                                                                                                   | 4,5                |
| Bias                      | 9      | Describe any efforts to address potential sources of bias                                                                                                                                                                                                                                                                                                                                                                                                              | 4                  |
| Study size                | 10     | Explain how the study size was arrived at                                                                                                                                                                                                                                                                                                                                                                                                                              | 4                  |
| Quantitative variables    | 11     | Explain how quantitative variables were handled in the analyses. If applicable, describe which groupings were chosen and why                                                                                                                                                                                                                                                                                                                                           | 5                  |
| Statistical methods       | 12     | (a) Describe all statistical methods, including those used to control for confounding                                                                                                                                                                                                                                                                                                                                                                                  | 5                  |
|                           |        | (b) Describe any methods used to examine subgroups and interactions                                                                                                                                                                                                                                                                                                                                                                                                    | 5                  |
|                           |        | (c) Explain how missing data were addressed                                                                                                                                                                                                                                                                                                                                                                                                                            | 5                  |
|                           |        | (d) <i>Cohort study</i> —If applicable, explain how loss to follow-up was addressed<br><i>Case-control study</i> —If applicable, explain how matching of cases and controls was addressed                                                                                                                                                                                                                                                                              | 4                  |

|                          |     |                                                                                                                                                                                                              |                |
|--------------------------|-----|--------------------------------------------------------------------------------------------------------------------------------------------------------------------------------------------------------------|----------------|
|                          |     | <i>Cross-sectional study</i> —If applicable, describe analytical methods taking account of sampling strategy                                                                                                 |                |
|                          |     | (e) Describe any sensitivity analyses                                                                                                                                                                        | Not applicable |
| <b>Results</b>           |     |                                                                                                                                                                                                              |                |
| Participants             | 13* | (a) Report numbers of individuals at each stage of study—eg numbers potentially eligible, examined for eligibility, confirmed eligible, included in the study, completing follow-up, and analysed            | 6              |
|                          |     | (b) Give reasons for non-participation at each stage                                                                                                                                                         | Not applicable |
|                          |     | (c) Consider use of a flow diagram                                                                                                                                                                           | Not applicable |
| Descriptive data         | 14* | (a) Give characteristics of study participants (eg demographic, clinical, social) and information on exposures and potential confounders                                                                     | 15,16          |
|                          |     | (b) Indicate number of participants with missing data for each variable of interest                                                                                                                          | 15,16          |
|                          |     | (c) <i>Cohort study</i> —Summarise follow-up time (eg, average and total amount)                                                                                                                             | 15,16          |
| Outcome data             | 15* | <i>Cohort study</i> —Report numbers of outcome events or summary measures over time                                                                                                                          | 6              |
|                          |     | <i>Case-control study</i> —Report numbers in each exposure category, or summary measures of exposure                                                                                                         | Not applicable |
|                          |     | <i>Cross-sectional study</i> —Report numbers of outcome events or summary measures                                                                                                                           | Not applicable |
| Main results             | 16  | (a) Give unadjusted estimates and, if applicable, confounder-adjusted estimates and their precision (eg, 95% confidence interval). Make clear which confounders were adjusted for and why they were included | 6, 15-25       |
|                          |     | (b) Report category boundaries when continuous variables were categorized                                                                                                                                    | 6,15-25        |
|                          |     | (c) If relevant, consider translating estimates of relative risk into absolute risk for a meaningful time period                                                                                             | 6,15-25        |
| Other analyses           | 17  | Report other analyses done—eg analyses of subgroups and interactions, and sensitivity analyses                                                                                                               | 15-25          |
| <b>Discussion</b>        |     |                                                                                                                                                                                                              |                |
| Key results              | 18  | Summarise key results with reference to study objectives                                                                                                                                                     | 7              |
| Limitations              | 19  | Discuss limitations of the study, taking into account sources of potential bias or imprecision. Discuss both direction and magnitude of any potential bias                                                   | 9              |
| Interpretation           | 20  | Give a cautious overall interpretation of results considering objectives, limitations, multiplicity of analyses, results from similar studies, and other relevant evidence                                   | 9              |
| Generalisability         | 21  | Discuss the generalisability (external validity) of the study results                                                                                                                                        | 9              |
| <b>Other information</b> |     |                                                                                                                                                                                                              |                |
| Funding                  | 22  | Give the source of funding and the role of the funders for the present study and, if applicable, for the original study on which the present article is based                                                | 9,10           |

\*Give information separately for cases and controls in case-control studies and, if applicable, for exposed and unexposed groups in cohort and cross-sectional studies.

**Note:** An Explanation and Elaboration article discusses each checklist item and gives methodological background and published examples of transparent reporting. The STROBE checklist is best used in conjunction with this article (freely available on the Web sites of PLoS Medicine at <http://www.plosmedicine.org/>, Annals of Internal Medicine at <http://www.annals.org/>, and Epidemiology at <http://www.epidem.com/>). Information on the STROBE Initiative is available at [www.strobe-statement.org](http://www.strobe-statement.org).



**The Five-minute Apgar Score as a Predictor of Childhood Cancer: a population-based Cohort Study in Five Million Children**

|                                 |                                                                                                                                                                                                                                            |
|---------------------------------|--------------------------------------------------------------------------------------------------------------------------------------------------------------------------------------------------------------------------------------------|
| Journal:                        | <i>BMJ Open</i>                                                                                                                                                                                                                            |
| Manuscript ID:                  | bmjopen-2012-001095.R1                                                                                                                                                                                                                     |
| Article Type:                   | Research                                                                                                                                                                                                                                   |
| Date Submitted by the Author:   | 25-Jun-2012                                                                                                                                                                                                                                |
| Complete List of Authors:       | Li, Jiong; Aarhus University, Public Health<br>Cnattingius, Sven<br>Gissler, M; THL National Institute for Health and Welfare, Information<br>VESTERGAARD, Mogens<br>Obel, Carsten<br>AHRENSBERG, Jette<br>Olsen, Jørn; Aarhus University, |
| <b>Primary Subject Heading</b>: | Epidemiology                                                                                                                                                                                                                               |
| Secondary Subject Heading:      | Epidemiology, Public health, Oncology, Reproductive medicine, obstetrics and gynaecology                                                                                                                                                   |
| Keywords:                       | Epidemiology < ONCOLOGY, Paediatric oncology < ONCOLOGY, PREVENTIVE MEDICINE                                                                                                                                                               |
|                                 |                                                                                                                                                                                                                                            |

SCHOLARONE™  
Manuscripts

only

1 25062012  
2  
3

4 **The five-minute Apgar score as a predictor of childhood cancer: a population-based cohort study**  
5  
6 **in five million children**  
7

8  
9 Jiong Li, PhD<sup>1</sup> Sven Cnattingus, PhD<sup>2</sup> Mika Gissler, PhD<sup>3</sup> Mogens Vestergaard, PhD<sup>4,5</sup> Carsten Obel,  
10  
11 PhD<sup>4,6</sup> Jette Ahrensberg, MD<sup>5</sup> Jørn Olsen, PhD<sup>1,7</sup>  
12  
13

14  
15  
16 <sup>1</sup> Section for Epidemiology, Department of Public Health, Aarhus University, Denmark  
17

18 <sup>2</sup> Clinical Epidemiology Unit, Department of Medicine, Karolinska Institute, Sweden  
19

20 <sup>3</sup> National Institute for Health and Welfare, Finland / Nordic School of Public Health,  
21  
22 Sweden  
23

24 <sup>4</sup> Section for General Practice, Department of Public Health, Aarhus University, Denmark  
25  
26

27 <sup>5</sup> Research Unit for General Practice, Department of Public Health, Aarhus University, Denmark  
28  
29

30 <sup>6</sup> Research Program for Mental Child Health, Department of Public Health, Aarhus University,  
31  
32 Denmark  
33

34 <sup>7</sup> Department of Epidemiology, School of Public Health, University of California, Los Angeles, USA  
35  
36

37 Correspondence to:

38  
39 Jiong Li, MD, PhD

40  
41  
42 Section of Epidemiology, Department of Public Health, Aarhus University

43  
44 Bartholins Alle 2, DK 8000 Aarhus C, Denmark

45  
46  
47 Tel: +45 8716 7972; Fax: +45 8613 1580; Email: [jl@soci.au.dk](mailto:jl@soci.au.dk)  
48  
49

50  
51  
52 Date of revision: 25 June 2012

53  
54  
55 Word count of text: 2634  
56  
57  
58  
59  
60

25062012

## ABSTRACT

**Objective:** The etiology of childhood cancer remains largely unknown but recent research indicates that uterine environment plays an important role. We aimed to examine the association between the Apgar score at 5 minutes after birth and the risk of childhood cancer.

**Design:** Nationwide population-based cohort study.

**Setting:** Nationwide register data in Denmark and Sweden.

**Study population:** All live-born singletons born in Denmark from 1978 to 2006 (N=1,771,615) and in Sweden from 1973 to 2006 (N=3,319,573). Children were followed up from birth to 14 years of age.

**Main outcome measures:** Rates and hazard ratios (HRs) for all childhood cancers and for specific childhood cancers.

**Results:** A total of 8087 children received a cancer diagnosis (1.6 per 1000). Compared to children with a 5-minute Apgar score of 9-10, children with a score of 0-5 had a 46% higher risk of cancer (adjusted hazard ratio (HR) 1.46, 95% confidence interval (CI) 1.15-1.89). The potential effect of low Apgar score on overall cancer risk was mostly confined to children diagnosed before 6 months of age. Children with an Apgar score of 0-5 had higher risks for several specific childhood cancers including Wilms' tumor (HR 4.33, 95% CI 2.42-7.73).

**Conclusions:** A low five-minute Apgar score was associated with a higher risk of childhood cancers diagnosed shortly after birth. Our data suggest that environmental factors operating before or during delivery may play a role on the development of several specific childhood cancers.

**Key words** the Apgar score at 5 minutes, cohort, developmental origins of disease, childhood cancer.

25062012

## INTRODUCTION

Childhood cancer is the second leading cause of deaths in children in high income countries, and is of major concern for patients, families, and societies.<sup>1,2</sup> In spite of extensive research, little is known about the etiology of childhood cancer.<sup>1,2</sup> Almost half of childhood cancers are diagnosed before 5 year of age,<sup>1</sup> indicating that some of the causal factors operate in utero or in early postnatal life.<sup>3,4</sup> However, only few such risk factors have been identified.<sup>5</sup> Birth characteristics may represent the interactions between genetic susceptibility and prenatal environmental causes,<sup>6-8</sup> but the empirical evidence available to date is inconsistent and inconclusive.<sup>6-9</sup>

The Apgar score, which is assigned to virtually every newborn, evaluates the clinical state of the newborns based on five physical signs (heart rate, respiratory effort, reflex irritability, muscle tone, and color) present shortly after birth.<sup>10</sup> A total score of 9 or 10 indicates that the baby is 'in its best possible condition'.<sup>10</sup> Although the usefulness of the Apgar score has been questioned in recent years,<sup>11</sup> this scoring system remains the only widely used and accepted tool for assessing the vitality of newborn infants across the world.<sup>12,13</sup> The five-minute Apgar score is a predictor of neonatal mortality,<sup>14</sup> and several neurological outcomes.<sup>15-19</sup> A suboptimal fetal environment<sup>20</sup> related to a low Apgar score may also be associated with compromised immune responses against tumors,<sup>21</sup> which can predict long-term health problems,<sup>22,23</sup> including future cancer risk.

In this population-based cohort study, we examined the association between the Apgar score at five minutes of age and childhood cancer, after taking other birth characteristics,<sup>8,24</sup> maternal socio-demographic characteristics,<sup>1,2</sup> and maternal smoking during pregnancy<sup>25,26</sup> into account. We hypothesized that children with a low Apgar score have a higher risk of childhood cancer than children with an optimal Apgar score.<sup>21</sup>



25062012

## METHODS

### Study design and study population

Data from eight national registers in Sweden and Denmark were linked by the unique personal identification number, which is assigned to each resident in the Scandinavian countries.<sup>27</sup> This population-based cohort study<sup>28</sup> included all singleton children born in Denmark from 1978 to 2006 (N=1,771,615) and in Sweden from 1973 to 2006 (N=3,319,573). Children were followed from birth until a cancer diagnosis, death, emigration, 14 years of age, or end of follow up (December 31<sup>st</sup>, 2006 in Sweden, December 31<sup>st</sup>, 2007 in Denmark), whichever came first. The 610 children who had both a birth defect and a cancer diagnosis were excluded, as some birth defects are closely associated with childhood cancers. The final study population included 5,091,188 children.

The Apgar score at 5 minutes of age and other birth characteristics (gestational age, birth weight, etc) were retrieved from Medical Birth Registers (MBR) in Denmark and in Sweden. The Danish Medical Birth Register was established in 1968<sup>29</sup> and the Swedish Medical Birth Register in 1973 ([http://www.socialstyrelsen.se/Lists/Artikelkatalog/Attachments/10655/2003-112-3\\_20031123.pdf](http://www.socialstyrelsen.se/Lists/Artikelkatalog/Attachments/10655/2003-112-3_20031123.pdf)). These registers include data on practically all deliveries in Denmark and Sweden, respectively, and the information is collected from medical records in prenatal, delivery and neonatal care. It is compulsory for every health care provider to report to the registers.<sup>30</sup>

Socio-demographic factors were obtained from the Danish Integrated Database for Longitudinal Labor Market Research (IDA), the Danish Civil Registry System, the Swedish Education Registry, and the Swedish Registry of Population and Population Changes.<sup>28</sup>

### Outcome measurements

25062012

1  
2  
3  
4 Data on cancer was obtained from national cancer registries, and the registration and coding practices  
5  
6 have been described elsewhere.<sup>31,32</sup> The main outcomes of interest were all incident cancers (ICD-7  
7  
8 codes 104-205, ICD-10 codes C00-97) diagnosed before 15 years of age and the most frequent  
9  
10 childhood cancers for which uterine environment has been suggested to play a role:<sup>3,4,6-9</sup> leukemias  
11  
12 (ICD-7 code 204, ICD-10 codes C91-95), lymphomas (ICD-7 code 201-203, ICD-10 code C81-C85),  
13  
14 brain and nervous system tumors (ICD-7 code 193, ICD-10 codes C70-C72, C47, C74.1),  
15  
16 retinoblastoma (ICD-7 code 192 and PAD 436, ICD-10 code C69.2), Wilms' tumor (ICD-7 code 180  
17  
18 and PAD 886, ICD-10 code C64.9), hepatoblastoma (ICD-7 code 155, ICD-10 code C22), malignant  
19  
20 bone tumors (ICD-7 code 196, ICD-10 codes C40-C41), and testicular cancer (ICD-7 code 178, ICD-  
21  
22 10 code C62).  
23  
24  
25  
26  
27  
28  
29

### 30 **Statistical analysis**

31  
32 All data handling and statistical analyses were performed using SAS version 9.2 statistical software  
33  
34 package (SAS Institute, Inc., Cary, North Carolina). The low Apgar score was categorized into each  
35  
36 single score and also into 2 subgroups (0-5 and 6-8), as a very low score would be different from a  
37  
38 score of over 5.<sup>10</sup> Hazards ratios with 95% confidence intervals were estimated by Cox regression with  
39  
40 the PHREG procedure. Potential confounders were included in the model, such as country (Denmark,  
41  
42 Sweden), child sex (male, female) and birth characteristics ((parity (1, 2,  $\geq 3$ ), birth weight (<2500 g,  
43  
44 2500-3249 g, 3250-3999 g, and  $\geq 4000$  g), gestational age (<37 weeks and  $\geq 37$  weeks)), maternal  
45  
46 factors ((age ( $\leq 26$  years, 27-30 years, and  $\geq 31$  years), education level (low:  $\leq 9$  years, middle: 10-14  
47  
48 years, and high:  $\geq 15$  years) (available Swedish data from 1990, 1995, 2000, and 2005, available annual  
49  
50 Danish data from 1978-2006),<sup>29</sup> smoking during pregnancy (yes, no) (available 1991-2007 in Denmark  
51  
52 and 1983-2006 in Sweden)).  
53  
54  
55  
56  
57  
58  
59  
60

25062012

1  
2  
3  
4  
5  
6  
7  
8  
9  
10  
11  
12  
13  
Analyses were performed when we excluded children diagnosed with cancer before 6 months of age to see how the overall effect of a low Apgar score would change when most embryonic cancers are excluded. We also repeated our analyses by dropping Wilms' tumor, hepatoblastoma, testicular cancer, and retinoblastoma to see how the overall effect would be driven by these 4 childhood cancers.

14  
15  
16  
17  
18  
19  
20  
21  
22  
23  
24  
25  
26  
27  
28  
29  
30  
31  
32  
33  
34  
35  
36  
37  
38  
39  
40  
41  
42  
43  
44  
45  
46  
47  
48  
49  
50  
51  
52  
53  
54  
55  
56  
57  
58  
59  
60  
Analyses were also stratified by country, sex, birth weight, gestational age, and parity, which have been suggested to be associated with both Apgar score and cancer risk.<sup>1,2</sup> Analyses were also performed for the sub-cohorts where information on maternal smoking was available.

25062012

## RESULTS

The baseline characteristics of the study population (5,061,798 singletons) are shown in Table 1 according to the 3 subgroups of Apgar scores (0 to 5, 6-8, and 9-10). Low Apgar scores were comparable for most characteristics but more frequent among children born preterm or with low birth weight.

A total of 8087 children were diagnosed with cancer before 14 years of age (1.6 per 1000 children). Table 2 presents that children with a score of 0 to 5 had a higher overall rate of childhood cancer (2.0 per 1000) than those with a score of 6 to 8 (1.7 per 1000), and those with a score of 9 to 10 (1.6 per 1000). Compared to children with a five-minute Apgar score of 9-10, children with a score of 0-5 had a 46% increased risk of cancer before 14 years of age (adjusted Hazard ratio (HR) 1.46, 95% confidence interval (CI) 1.15-1.89), but children with a score of 6-8 had no increased risk of cancer (HR 1.05, 95% CI 0.92-1.18).

Table 3 shows that the HRs in children according to age at cancer diagnosis. For cancer diagnosed before 6 months of age, an Apgar score of 0-5 was associated with 6-fold overall risk (HR 6.04, 95% CI 3.73-9.76) and an Apgar score of 6-8 was associated with a two-fold increase in risk (HR 2.17, 95% CI 1.54-3.05). The most frequent diagnosed cancers during this period include tumors from brain/nervous system, endocrinal glands, kidney, and leukemia/lymphomas (data not shown). There were no statistically significant increased risks for cancer diagnosed after 6 months of age.

Compared to children with an Apgar score of 9-10, children with a score of 0-5 had higher risks for several childhood cancers (CNS tumors, retinoblastoma, hepatic tumors, bone tumors, and testicular tumors), but most estimates were not statistically significant (Table 4). Low Apgar scores did not

25062012

1  
2  
3  
4 influence risks of lymphatic / hemapoietic neoplasms. The highest HR was observed in children with a  
5  
6 score of 0-5 for Wilms' tumor (HR 4.33, 95% CI 2.42-7.73).  
7  
8  
9

10  
11 When Wilms' tumor, testicular cancer, hepatic cancer, and retinoblastoma were not included in the  
12  
13 analyses, the estimates for overall effect of a low Apgar score are smaller but the risks remain elevated  
14  
15 (data not shown). With these exclusions, the estimates for cancer diagnosed before 6 months were even  
16  
17 slightly higher (data not shown) than those presented in Table 3. When we excluded cancers diagnosed  
18  
19 during the first 6 months of life, a low Apgar score was not associated with increased overall cancer  
20  
21 risk or with CNS cancer (data not shown). Estimates for other cancers, such as Wilms' tumor,  
22  
23 remained essentially unchanged (data not shown).  
24  
25  
26  
27  
28

29 The elevated risks related to an Apgar score of 0-5 were higher in almost all each stratum of the  
30  
31 covariates, such as country (Denmark, Sweden), child sex (male, female) and birth characteristics  
32  
33 ((parity (1, 2,  $\geq 3$ ), birth weight (<2500 g, 2500-3249 g, 3250-3999 g, and  $\geq 4000$  g), gestational age  
34  
35 (<37 weeks and  $\geq 37$  weeks)), maternal factors ((age ( $\leq 26$  years, 27-30 years, and  $\geq 31$  years), education  
36  
37 level (low:  $\leq 9$  years, middle: 10-14 years, and high:  $\geq 15$  years),<sup>29</sup> and smoking during pregnancy (yes,  
38  
39 no))(data not shown).  
40  
41  
42  
43  
44  
45  
46  
47  
48  
49  
50  
51  
52  
53  
54  
55  
56  
57  
58  
59  
60

25062012

## DISCUSSION

Children with a low 5-minute Apgar score, especially children with a score of 0 to 5, had a higher overall risk of childhood cancer that was diagnosed before 6 months of age. We also observed higher risks for several main childhood cancers like Wilms' tumor. The associations were independent of country, child sex, child birth characteristics (birth weight, birth order, and gestational age), and maternal factors (age, education, and smoking during pregnancy). However, we found no association between low Apgar score and risk of leukemia and other lymphatic / hemopoietic malignancies.

The theory of 'developmental-origins of health and disease' proposes the importance of in utero environment for long-term human health.<sup>22,23</sup> We observed that children with a low Apgar score between 0 to 5 had a higher overall cancer risk than those with an optimal score (9 or 10). The mechanism underlying this observation is, however, unclear. A low Apgar score is a marker of a suboptimal fetal environment<sup>20</sup> or other factors that prevent the child from achieving a high score. From a programming perspective, it is interesting to observe that the effect of a low Apgar score on overall cancer risk was the strongest for cancers diagnosed before 6 months of age. Tumors from brain/nervous system, endocrinal glands, kidney, and leukemia/lymphomas were among the most frequent diagnosed cancers during this period. This observation is in line with suggestions from previous studies that in utero exposures to insulin-like growth factors,<sup>8</sup> estrogens,<sup>33,34</sup> or infections<sup>24,35</sup> may play a role for the relationships between other birth outcomes and many childhood cancers, or childhood cancer risk in general. A low Apgar score probably shares etiology with cancers initiated in fetal life, and different biological pathways may operate for the association between Apgar score and childhood cancers. For example, neonatal treatments related to low Apgar scores may increase the risk of some childhood cancers.<sup>36,37</sup>

25062012

1  
2  
3  
4 The best evidence for fetal origins of childhood cancer has been available for leukemia.<sup>7, 8, 38</sup>  
5  
6 Our findings suggest that those observations may operate through the mechanisms that do not affect the  
7  
8 Apgar score, and similar interpretations apply to other lymphatic / hemopoietic neoplasms. The  
9  
10 associations between a low Apgar score and several other specific childhood cancers in our study are  
11  
12 noteworthy. For example, the highest risk of a low Apgar score was obtained for Wilms' tumor, which  
13  
14 is in line with observations in two register-based studies (restricted to only girls in one of the studies)  
15  
16 <sup>39, 40</sup> but not in another case-control study.<sup>41</sup> Hypoxia, as indicated by a low score, may result in cell  
17  
18 damage that subsequently leads to Wilms' tumor.<sup>42, 43</sup> Alternatively, neonatal treatments provided to  
19  
20 neonates with a low Apgar score may also increase the risk of Wilms' tumor.<sup>36, 37</sup> Hepatoblastoma is  
21  
22 reported to be associated with factors like low birth weight,<sup>44</sup> smoking during pregnancy or young  
23  
24 maternal age.<sup>45</sup> A recent study showed a reverse association between birth order and retinoblastoma.<sup>9</sup>  
25  
26 However, the observed elevated risks of both hepatoblastoma and retinoblastoma after adjustment  
27  
28 might indicate an independent role of a low Apgar score for these two childhood cancers.  
29  
30  
31  
32  
33  
34

35 The observed associations between low Apgar scores and childhood cancer risk were not  
36  
37 explained by other adverse birth outcomes, which have been widely used as the proxy indicators of  
38  
39 fetal environment to explain fetal origins for a number of adult diseases.<sup>22, 23</sup> As expected, a low Apgar  
40  
41 score was more common among children with adverse birth outcomes, which often correlate with  
42  
43 childhood cancers.<sup>7-9, 38</sup> However, the elevated risks related to a low score were observed in almost all  
44  
45 subgroups of baseline characteristics, including but not restricted to pregnancies with adverse birth  
46  
47 outcomes. Furthermore, the associations were consistent according to country and maternal factors  
48  
49 under investigation.  
50  
51  
52

53 The most important strengths of our study include the prospective longitudinal design, large  
54  
55 sample size, and detailed data on other covariates. The registry system in the Nordic countries provides  
56  
57  
58  
59  
60

25062012

1  
2  
3  
4 both a complete case ascertainment and accurate linkage with other data, which allow complete follow  
5  
6 up with least impact of misclassification error.<sup>27</sup> The rarity of childhood cancer makes population-  
7  
8 based epidemiological studies very difficult. Much of the heterogeneity of previous results might be  
9  
10 due to the small sample sizes and lack of control for factors related to the child or the mother. Our data  
11  
12 enabled us to do a more in-depth investigation by examining risks in subgroups. The cohort design  
13  
14 based on prospectively collected high quality data minimized the impact of information or recall bias.  
15  
16

17  
18 One limitation of our study is that we lack information on risk factors after birth. However,  
19  
20 factors associated with a low Apgar score, such as related neonatal treatments, may lie in the pathways  
21  
22 between exposure and outcome, and should not necessarily be controlled for in the analyses.<sup>46</sup> A  
23  
24 second limitation is that we cannot rule out the confounding of factors like environmental exposures  
25  
26 after birth. Third, the case numbers for several childhood cancers are small, although the total  
27  
28 population included over 5 million children.  
29  
30  
31

32  
33 To conclude, our findings support the developmental-origins hypothesis of childhood cancer.  
34  
35 An association between a low Apgar score and childhood cancer does not prove a causal role of the  
36  
37 components that make up the Apgar score but strengthens the relevance of viewing the prenatal time  
38  
39 period as a causal time window of interest. A low Apgar score may reflect a pathologic pregnancy  
40  
41 which could share causes with childhood cancers, or childhood cancers may have a clinical onset that  
42  
43 starts during fetal life. In the first situation, a low Apgar score may also be associated with cancer risk  
44  
45 in adulthood. In addition to being a widely accepted assessment tool in neonatal care, the Apgar score  
46  
47 may indicate programming effects of fetal environment on further health, suggesting that its role in  
48  
49 clinical practice and public health may reach beyond its current use.  
50  
51  
52  
53  
54  
55  
56  
57  
58  
59  
60



25062012

1  
2  
3  
4 **Funding** This work was supported by a grant to Dr. Jiong Li from the European Research Council  
5  
6 (ERC-2010-StG no. 260242, the European Union Seventh Framework Programme (EU FP7)); and the  
7  
8 Nordic Cancer Union (2008); and the NordForsk (070331); the Danish Medical Research Council  
9  
10 (projects no. 09-060229, 09-063494, and 09-072986); and the Swedish Council for Working Life and  
11  
12 Social Research (Grant no. 2010-0092).  
13  
14

15  
16 **Competing Interests** None.  
17

18  
19 **Contributors** JL conceived the research, analysed the data and wrote the first draft of the manuscript.  
20  
21 JL, SC, MG, MV, CO, JA, and JO contributed to data analysis, interpretation of results, and critical  
22  
23 revision of the manuscript. All authors approved the final manuscript.  
24

25  
26 **Ethics approval** The study was approved by Danish Data Protection Agency (j nr. 2008-41-2680),  
27  
28 Scientific Ethics Committee of Central Region Jylland (VEK, sagnr. M-20100252), Research Ethics  
29  
30 Committee (EPN) at Karolinska Institutet (Ref no. 2008 /4:6).  
31

32  
33 **Patient consent** not needed for register-based research according to laws in Denmark and Sweden.  
34

35  
36 **Provenance and peer review** Not commissioned; externally peer reviewed.  
37

38  
39 **Data sharing statement** There are no additional data available.  
40  
41  
42  
43  
44  
45  
46  
47  
48  
49  
50  
51  
52  
53  
54  
55  
56  
57  
58  
59  
60

25062012

## ARTICLE SUMMARY

### Article focus

- The etiology of childhood cancer remains largely unknown but recent research indicates that uterine environment plays an important role.
- The Apgar score may have more implications than its role in current clinical practice

### Key messages

- A low five-minute Apgar score was associated with a higher risk of childhood cancer, suggesting that environmental factors operating before or during delivery may play a causal role.
- In addition to as an assessment tool for a newborn's clinical status, the Apgar score at 5 minutes may also indicate programming effect of fetal environment on diseases in later life, including childhood cancer.

### Strengths and limitation of this study

- The most important strengths of our study include singletons in a prospectively longitudinal design, large sample size of 5 million, complete follow up, accurate data on Apgar score and cancer diagnosis, and detailed data on covariates.
- The limitations of our study are that we lack information on risk factors after birth and the case numbers for several childhood cancers are small.

25062012

## REFERENCES

1. Kaatsch P. Epidemiology of childhood cancer. *Cancer Treat Rev* 2010;36:277-285.
2. Parkin DM, Whelan S, Ferlay J, et al. *Cancer Incidence in Five Continents VIII*. IARC Scientific Publications. 2002. Lyon, France, IARC.
3. Anderson LM. Environmental genotoxicants/carcinogens and childhood cancer: Bridgeable gaps in scientific knowledge. *Mutat Res* 2006;608:136-156.
4. Kimmel GL. An overview of children as a special population--Relevance to predictive biomarkers. *Toxicol Appl Pharmacol* 2005;206:215-218.
5. Garner MJ, Turner MC, Ghadirian P, et al. Epidemiology of testicular cancer: an overview. *Int J Cancer* 2005;116:331-339.
6. Greaves M. Molecular genetics, natural history and the demise of childhood leukaemia. *Eur J Cancer* 1999;35:1941-1953.
7. Ma X, Metayer C, Does MB, et al. Maternal pregnancy loss, birth characteristics, and childhood leukemia (United States). *Cancer Causes Control* 2005;16:1075-1083.
8. Tower RL, Spector LG. The epidemiology of childhood leukemia with a focus on birth weight and diet. *Crit Rev Clin Lab Sci* 2007;44:203-242.
9. Von Behren J, Spector LG, Mueller BA et al. Birth order and risk of childhood cancer: A pooled analysis from five US States. *Int J Cancer* 2011;128:2709-2716.
10. APGAR V. A proposal for a new method of evaluation of the newborn infant. *Curr Res Anesth Analg* 1953;260-267.
11. No authors listed. Use and abuse of the Apgar score. Committee on Fetus and Newborn, American Academy of Pediatrics, and Committee on Obstetric Practice, American College of Obstetricians and Gynecologists. *Pediatrics* 1996;98:141-142.
12. Finster MMD, Wood MMD. The Apgar Score Has Survived the Test of Time. *Anesthesiology* 2005;102:855-857.
13. Papile LA. The Apgar Score in the 21st Century. *N Engl J Med* 2001;344:519-520.
14. Casey BM, McIntire DD, Leveno KJ. The Continuing Value of the Apgar Score for the Assessment of Newborn Infants. *N Engl J Med* 2001;344:467-471.
15. Li J, Olsen J, Vestergaard M, et al. Low Apgar Scores and Risk of Childhood Attention Deficit Hyperactivity Disorder. *J Pediatr* 2011;158:775-779.

25062012

16. Moster D, Lie RT, Irgens LM, et al. The association of Apgar score with subsequent death and cerebral palsy: A population-based study in term infants. *J Pediatrics* 2001;138:798-803.
17. Odd DE, Rasmussen F, Gunnell D, et al. A cohort study of low Apgar scores and cognitive outcomes. *Arch Dis Child Fetal Neonatal Ed* 2008;93:F115-F120.
18. Stuart A, Olausson PO, Kallen K. Apgar scores at 5 minutes after birth in relation to school performance at 16 years of age. *Obstet Gynecol* 2011;118:201-208.
19. Sun Y, Vestergaard M, Pedersen CB, et al. Apgar scores and long-term risk of epilepsy. *Epidemiology* 2006;17:296-301.
20. Gilstrap LC, III, Hauth JC, Hankins GD, et al. Second-stage fetal heart rate abnormalities and type of neonatal acidemia. *Obstet Gynecol* 1987;70:191-195.
21. Ekblom A. The developmental environment and the early origins of cancer. In: Gluckman P, Hanson M, editors. *Developmental origins of health and disease*. Cambridge: Cambridge University Press; 2006:415-425.
22. Gluckman PD, Hanson MA. Living with the Past: Evolution, Development, and Patterns of Disease. *Science* 2004;305:1733-1736.
23. Gluckman PD, Hanson MA, Cooper C, et al. Effect of In Utero and Early-Life Conditions on Adult Health and Disease. *N Engl J Med* 2008;359:61-73.
24. Greaves M. Childhood leukaemia. *BMJ* 2002;324:283-287.
25. Okasha M, McCarron P, Gunnell D, et al. Exposures in childhood, adolescence and early adulthood and breast cancer risk: a systematic review of the literature. *Breast Cancer Res Treat* 2003 2003;78:223-276.
26. Park SK, Kang D, McGlynn KA et al. Intrauterine environments and breast cancer risk: meta-analysis and systematic review. *Breast Cancer Res* 2008 2008;10:R8.-Epub 2008.
27. Frank L. *Epidemiology*. When an entire country is a cohort. *Science* 2000;287:2398-2399.
28. Li J, Vestergaard M, Obel C, et al. Cohort Profile: The Nordic Perinatal Bereavement Cohort. *Int J Epidemiol* 2010;40:1161-1167.
29. Knudsen LB, Olsen J. The Danish Medical Birth Registry. *Dan Med Bull* 1998;45:320-323.
30. Axelsson O. The Swedish Medical Birth Register. *Acta Obstetrica et Gynecologica Scandinavica* 2003;82:491-492.
31. Barlow L, Westergren K, Holmberg L, et al. The completeness of the Swedish Cancer Register ΓÇô a sample survey for year 1998. *Acta Oncol* 2009;48:27-33.

25062012

32. Gjerstorff ML. The danish cancer registry. *Scand J Public Health* 2011;39:42-45.
33. Petridou E, Panagiotopoulou K, Katsouyanni K, et al. Tobacco smoking, pregnancy estrogens, and birth weight. *Epidemiology* 1990;1:247-250.
34. Liehr JG. Is estradiol a genotoxic mutagenic carcinogen? *Endocr Rev* 2000;21:40-54.
35. Law GR. Host, family and community proxies for infections potentially associated with leukaemia. *Radiat Prot Dosimetry* 2008;132:267-272.
36. Sadetzki S, Mandelzweig L. Childhood exposure to external ionising radiation and solid cancer risk. *Br J Cancer* 0 AD;100:1021-1025.
37. Spector LG, Klebanoff MA, Feusner JH, et al. Childhood Cancer Following Neonatal Oxygen Supplementation. *The Journal of Pediatrics* 2005;147:27-31.
38. Greaves M. Molecular genetics, natural history and the demise of childhood leukaemia. *Eur J Cancer* 1999 Feb 1995;33:173-185.
39. Heuch JM, Heuch I, Kvale G. Birth characteristics and risk of Wilms' tumour: a nationwide prospective study in Norway. *Br J Cancer* 1996;74:1148-1151.
40. Schuz J, Schmidt LS, Kogner P et al. Birth characteristics and Wilms tumors in children in the Nordic countries: A register-based case-control study. *Int J Cancer* 2011;128:2166-2173.
41. Puumala SE, Soler JT, Johnson KJ, et al. Birth characteristics and Wilms tumor in Minnesota. *Int J Cancer* 2008;122:1368-1373.
42. Ruan K, Song G, Ouyang G. Role of hypoxia in the hallmarks of human cancer. *J Cell Biochem* 2009;107:1053-1062.
43. Rankin EB, Giaccia AJ. The role of hypoxia-inducible factors in tumorigenesis. *Cell Death Differ* 2008;15:678-685.
44. Reynolds P, Urayama KY, Von Behren J, et al. Birth characteristics and hepatoblastoma risk in young children. *Cancer* 2004;100:1070-1076.
45. McLaughlin CC, Baptiste MS, Schymura MJ, et al. Maternal and Infant Birth Characteristics and Hepatoblastoma. *Am J Epidemiol* 2006;163:818-828.
46. Rothman KJ, Greenland S, Lash TL. *Modern Epidemiology*. Third ed. Philadelphia: Lippincott Williams & Wilkins; 2008.

**Table 1. Baseline characteristics of the study population according to the Apgar score \***

25062012

| <b>Apgar score at 5 minutes</b> |             |             |                |                |
|---------------------------------|-------------|-------------|----------------|----------------|
| <b>Variables</b>                | <b>0-5</b>  | <b>6-8</b>  | <b>9-10</b>    | <b>Unknown</b> |
| <b>Country</b>                  |             |             |                |                |
| Denmark                         | 10,673 (1)  | 42,118 (2)  | 1,669,956 (96) | 18,868 (1)     |
| Sweden                          | 22,694 (1)  | 116,167 (4) | 2,951,063 (90) | 229,649 (7)    |
| <b>Sex</b>                      |             |             |                |                |
| Boys                            | 18,829 (1)  | 89,973 (3)  | 2,365,951 (91) | 126,011 (5)    |
| Girls                           | 14,537 (1)  | 68,312 (3)  | 2,255,068 (92) | 122,506 (5)    |
| <b>Birth order</b>              |             |             |                |                |
| 1                               | 16,910 (1)  | 91,199 (4)  | 1,971,064 (90) | 100,239 (5)    |
| 2                               | 9388 (1)    | 42,290 (2)  | 1,694,866 (92) | 93,228 (5)     |
| ≥3                              | 5782 (1)    | 23,091 (2)  | 894,631 (92)   | 484,404 (5)    |
| Unknown                         | 1287 (2)    | 1705 (2)    | 60,458 (86)    | 6646 (9)       |
| <b>Gestational age</b>          |             |             |                |                |
| <37 weeks                       | 8902 (4)    | 27,338 (11) | 191,552 (79)   | 14,439 (6)     |
| ≥37 weeks                       | 22,990 (<1) | 129,238 (3) | 4,368,046 (92) | 226,668 (5)    |
| Unknown                         | 1475 (2)    | 1709 (2)    | 61,421 (85)    | 7410 (10)      |
| <b>Birth weight (g)</b>         |             |             |                |                |
| <2500                           | 8238 (5)    | 22,489 (13) | 135,895 (76)   | 11,150 (6)     |
| 2500-3249                       | 7766 (1)    | 39,824 (3)  | 1,137,398 (91) | 62,399 (5)     |
| 3250-3999                       | 10,994 (<1) | 65,669 (2)  | 2,448,691 (92) | 128,267 (5)    |
| ≥4000                           | 4340 (<1)   | 27,736 (3)  | 833,472 (92)   | 37,497 (4)     |

25062012

|                                                      |            |            |                |             |
|------------------------------------------------------|------------|------------|----------------|-------------|
| Unknown                                              | 2029 (3)   | 2567 (3)   | 65,563 (83)    | 9204 (12)   |
| <b>Maternal age</b>                                  |            |            |                |             |
| ≤26                                                  | 12,936 (1) | 60,051 (3) | 1,690,721 (90) | 120,969 (6) |
| 27-30                                                | 9293 (1)   | 45,162 (3) | 1,378,031 (92) | 68,490 (5)  |
| ≥31                                                  | 11,134 (1) | 53,060 (3) | 1,552,002 (93) | 59,009 (4)  |
| Unknown                                              | 4 (1)      | 12 (4)     | 265 (83)       | 39 (12)     |
| <b>Maternal education (years)</b>                    |            |            |                |             |
| Low (≤9)                                             | 16,346 (1) | 72,583 (3) | 2,006,475 (90) | 146,220 (7) |
| Middle (10-14)                                       | 8770 (1)   | 45,007 (3) | 1,296,875 (92) | 52,045 (4)  |
| High (≥15)                                           | 5600 (1)   | 28,120 (3) | 908,327 (93)   | 36,363 (4)  |
| Unknown                                              | 2651 (1)   | 12,575 (3) | 409,342 (93)   | 13,889 (3)  |
| <b>Maternal smoking during pregnancy<sup>†</sup></b> |            |            |                |             |
| Yes                                                  | 4755 (1)   | 21,254 (3) | 633,618 (94)   | 10,935 (2)  |
| No                                                   | 14,661 (1) | 85,122 (3) | 2,419,740 (95) | 32,303 (1)  |
| Unknown                                              | 2395 (1)   | 9514 (4)   | 222,589 (91)   | 9968 (4)    |

\* Value is n (%). Study population includes all 5,091,188 singletons born in Denmark 1978-2006 and born in Sweden 1973-2006.

<sup>†</sup> Smoking status is available for 1991-2006 in Denmark and for 1983-2006 in Sweden.

25062012

**Table 2. Hazard Ratios (HRs) for childhood cancer according to the Apgar score at 5 minutes.**

| <b>Apgar score</b>         | <b>Cases (rate per 1000)</b> | <b>Crude HR</b>                  | <b>Adjusted HR (95% CI) *</b>    |
|----------------------------|------------------------------|----------------------------------|----------------------------------|
| <b>0</b>                   | 3 (0.7)                      | 0.47 (0.15-1.45)                 | 0.56 (0.18-1.73)                 |
| <b>1</b>                   | 15 (2.9)                     | 2.44 (1.47-4.04) †               | 2.17 (1.31-3.60) †               |
| <b>2</b>                   | 6 (1.9)                      | 1.89 (0.61-3.54)                 | 1.72 (0.77-3.82)                 |
| <b>3</b>                   | 9 (2.1)                      | 1.85 (0.96-3.56)                 | 1.67 (0.87-3.21)                 |
| <b>4</b>                   | 14 (2.2)                     | 1.61 (0.94-2.78)                 | 1.48 (0.86-2.55)                 |
| <b>5</b>                   | 21 (2.1)                     | 1.40 (0.91-2.18)                 | 1.32 (0.85-2.05)                 |
| <b><i>0-5 combined</i></b> | <b><i>68 (2.0)</i></b>       | <b><i>1.54 (1.21-1.96) †</i></b> | <b><i>1.46 (1.15-1.89) †</i></b> |
| <b>6</b>                   | 28 (1.5)                     | 1.03 (0.71-1.49)                 | 0.95 (0.66-1.38)                 |
| <b>7</b>                   | 61 (1.6)                     | 1.15 (0.99-1.34)                 | 1.00 (0.77-1.29)                 |
| <b>8</b>                   | 177 (1.7)                    | 1.18 (1.08-1.29)                 | 1.08 (0.93-1.26)                 |
| <b><i>6-8 combined</i></b> | <b><i>266 (1.7)</i></b>      | <b><i>1.12 (0.99-1.27)</i></b>   | <b><i>1.05 (0.92-1.18)</i></b>   |
| <b><i>9-10</i></b>         | <b><i>7216 (1.6)</i></b>     | <b><i>1.0 (ref)</i></b>          | <b><i>1.0 (ref)</i></b>          |

\* Adjusted for country, sex, maternal factors at child birth (age, education, and smoking during pregnancy), and birth characteristics of the child (birth weight, gestational age, birth order).

† P<0.05.



25062012

**Table 3. Hazard Ratios (HRs) for childhood cancer according to the Apgar score at 5 minutes, by age at diagnosis.**

| Age at diagnosis        | The Apgar score | Cases (rate, ‰) | Crude HR (95% CI)              | Adjusted HR (95% CI)*         |
|-------------------------|-----------------|-----------------|--------------------------------|-------------------------------|
| <b>Under 6 months</b>   |                 |                 |                                |                               |
|                         | 0-5             | 20 (0.6)        | 6.65 (4.15-10.65) <sup>†</sup> | 6.04 (3.73-9.76) <sup>†</sup> |
|                         | 6-8             | 39 (0.2)        | 2.43 (1.73-3.39) <sup>†</sup>  | 2.17 (1.54-3.05) <sup>†</sup> |
|                         | 9-10            | 465 (0.1)       | 1.0 (ref)                      | 1.0 (ref)                     |
| <b>6 months-5 years</b> |                 |                 |                                |                               |
|                         | 0-5             | 25 (0.9)        | 1.21 (0.82-1.79)               | 1.18 (0.80-1.76)              |
|                         | 6-8             | 134 (0.9)       | 1.15 (0.97-1.36)               | 1.09 (0.92-1.30)              |
|                         | 9-10            | 3678 (0.8)      | 1.0 (ref)                      | 1.0 (ref)                     |
| <b>&gt; 5 years</b>     |                 |                 |                                |                               |
|                         | 0-5             | 23 (1.0)        | 1.17 (0.78-1.77)               | 1.10 (0.73-1.65)              |
|                         | 6-8             | 93(0.7)         | 0.89 (0.73-1.10)               | 0.83 (0.67-1.02)              |
|                         | 9-10            | 3223 (0.8)      | 1.0 (ref)                      | 1.0 (ref)                     |

\*Adjusted for country, sex, maternal factors at child birth (age, education, and smoking during pregnancy), and birth characteristics of the child (birth weight, gestational age, and birth order).

<sup>†</sup> P<0.05.

25062012

**Table 4. Hazard Ratios (HRs) for main childhood cancers according to the Apgar score at 5 minutes**

| Cancer type           | Apgar score | Cancer cases (rate per 1000) | Crude HR (95% CI)             | Adjusted HR* (95% CI)         |
|-----------------------|-------------|------------------------------|-------------------------------|-------------------------------|
| <b>Leukemia</b>       | 0-5         | 13 (0.4)                     | 1.03 (0.60-1.79)              | 1.05 (0.61-1.81)              |
|                       | 6-8         | 71 (0.5)                     | 1.02 (0.81-1.29)              | 1.02 (0.80-1.29)              |
|                       | 9-10        | 2122 (0.5)                   | 1.0 (ref)                     | 1.0 (ref)                     |
| <b>Lymphomas</b>      | 0-5         | 3 (0.1)                      | 0.84 (0.27-2.60)              | 0.73 (0.23-2.27)              |
|                       | 6-8         | 12 (0.1)                     | 0.62 (0.35-1.09)              | 0.51 (0.29-0.90)              |
|                       | 9-10        | 598 (0.1)                    | 1.0 (ref)                     | 1.0 (ref)                     |
| <b>CNS cancers</b>    | 0-5         | 21 (0.6)                     | 1.24 (0.78-1.98)              | 1.22 (0.77-1.94)              |
|                       | 6-8         | 104 (0.7)                    | 1.29 (1.06-1.57) <sup>†</sup> | 1.26 (1.03-1.54) <sup>†</sup> |
|                       | 9-10        | 2432 (0.5)                   | 1.0 (ref)                     | 1.0 (ref)                     |
| <b>Retinoblastoma</b> | 0-5         | 3 (0.1)                      | 2.20 (0.70-6.84)              | 2.03 (0.64-6.39)              |
|                       | 6-8         | 4 (<0.05)                    | 0.52 (0.19-1.39)              | 0.48 (0.18-1.28)              |
|                       | 9-10        | 240 (0.1)                    | 1.0 (ref)                     | 1.0 (ref)                     |
| <b>Wilms' tumor</b>   | 0-5         | 12 (0.4)                     | 4.62 (2.61-8.20) <sup>†</sup> | 4.33 (2.42-7.73) <sup>†</sup> |
|                       | 6-8         | 18 (0.1)                     | 1.24 (0.77-1.99)              | 1.16 (0.72-1.87)              |

25062012

|                          |      |            |                   |                   |
|--------------------------|------|------------|-------------------|-------------------|
|                          | 9-10 | 444 (0.1)  | 1.0 (ref)         | 1.0 (ref)         |
| <b>Hepatoblastoma</b>    | 0-5  | 1 (<0.05)  | 1.78 (0.25-12.76) | 1.51 (0.21-10.96) |
|                          | 6-8  | 4 (<0.05)  | 1.27 (0.47-3.44)  | 1.06 (0.39-2.92)  |
|                          | 9-10 | 96 (<0.05) | 1.0 (ref)         | 1.0 (ref)         |
| <b>Bone cancer</b>       | 0-5  | 3 (0.1)    | 2.25 (0.72-7.02)  | 2.05 (0.65-6.45)  |
|                          | 6-8  | 6 (<0.05)  | 0.85 (0.38-1.90)  | 0.79 (0.35-1.80)  |
|                          | 9-10 | 220 (0.1)  | 1.0 (ref)         | 1.0 (ref)         |
| <b>Testicular cancer</b> | 0-5  | 0 (0)      | -                 | -                 |
|                          | 6-8  | 4 (<0.05)  | 2.08 (0.76-5.75)  | 1.89 (0.68-5.25)  |
|                          | 9-10 | 59 (<0.05) | 1.0 (ref)         | 1.0 (ref)         |

\* Adjusted for country, sex, maternal factors at child birth (age, education, and smoking during pregnancy), and birth characteristics of the child (birth weight, gestational age, birth order).

† P<0.05.

1  
2  
3  
4  
5  
6  
7 | ~~2506~~2012  
8  
9

10 **The five-minute Apgar score as a predictor of childhood cancer: a population-based cohort study**  
11 **in five million children**

12  
13 Jiong Li, PhD<sup>1</sup> Sven Cnattingus, PhD<sup>2</sup> Mika Gissler, PhD<sup>3</sup> Mogens Vestergaard, PhD<sup>4,5</sup> Carsten Obel,  
14 PhD<sup>4,6</sup> Jette Ahrensberg, MD<sup>5</sup> Jørn Olsen, PhD<sup>1,7,6</sup>  
15  
16  
17  
18

19 | <sup>1</sup> Section ~~for of~~ Epidemiology, Department of Public Health, Aarhus University, Denmark  
20

21 | <sup>2</sup> Clinical Epidemiology Unit, Department of Medicine, Karolinska Institute, Sweden  
22

23 | <sup>3</sup> National Institute for Health and Welfare, Finland / Nordic School of Public Health,  
24 Sweden  
25

26 | <sup>4</sup> Section ~~for of~~ General Practice, Department of Public Health, Aarhus University, Denmark  
27

28 | <sup>5</sup> Research Unit ~~for of~~ General Practice, Department of Public Health, Aarhus University, Denmark  
29

30 | <sup>6</sup> Research Program for Mental Child Health, Department of Public Health, Aarhus University,  
31 Denmark  
32  
33

34 | <sup>7</sup> Department of Epidemiology, School of Public Health, University of California, Los Angeles, USA  
35  
36  
37

38 Correspondence to:

39 Jiong Li, MD, PhD

40 Section of Epidemiology, Department of Public Health, Aarhus University

41 Bartholins Alle 2, DK 8000 Aarhus C, Denmark

42 Tel: +45 8716 7972; Fax: +45 8613 1580; Email: [jl@soci.au.dk](mailto:jl@soci.au.dk)  
43  
44  
45  
46  
47

48 | Date of revision: ~~2504 June~~ ~~March~~ 2012  
49

50 | Word count of text: ~~2634~~288  
51  
52  
53  
54  
55  
56  
57  
58  
59  
60

250642012

## ABSTRACT

**Objective:** The etiology of childhood cancer remains largely unknown but recent research indicates that uterine environment plays an important role. We aimed to examine the association between the Apgar score at 5 minutes after birth and the risk of childhood cancer.

**Design:** Nationwide population-based cohort study.

**Setting:** Nationwide register data in Denmark and Sweden.

**Study population:** All live-born singletons born in Denmark from 1978 to 2006 (N=1,774,615) and in Sweden from 1973 to 2006 (N=3,319,573). Children were followed up from birth to 14 years of age.

**Main outcome measures:** Rates and hazard ratios (HRs) for all childhood cancers and for specific childhood cancers.

**Results:** A total of 8087 children received a cancer diagnosis (1.67 per 1000). Compared to children with a 5-minute Apgar score of 9-10, children with a score of 0-5 had a 4650% higher risk of cancer (adjusted hazard ratio (HR) 1.4650, 95% confidence interval (CI) 1.159-1.89), whereas children with a score of 6-8 had a 14% higher risk (adjusted HR 1.14, 95% CI 1.02-1.28). The potential effect of low Apgar score on overall cancer risk was mostly confined to children diagnosed before 6 months of age. These associations were not modified by country, sex, birth characteristics, and maternal factors. Children with an Apgar score of 0-5 had higher risks for several specific most childhood cancers including Wilms' tumor (HR in general, but the confidence intervals for those estimates were often wide due to the small number of cases. The highest HR was 4.3378, (95% CI 2.4279-78.7349) for Wilms' tumor in children with an Apgar score of 0-5.

**Conclusions:** Our data shows that a low five-minute Apgar score was associated with a higher risk of childhood cancers diagnosed shortly after birth. Our data childhood cancer, suggesting that

1  
2  
3  
4  
5  
6  
7 | [250642012](#)  
8  
9

10 environmental factors operating before or during delivery may play a ~~causal~~ role on the development of  
11 several specific childhood cancers. ~~In addition to as an assessment tool for a newborn's clinical status,~~  
12 ~~the Apgar score at 5 minutes may also indicate programming effect of fetal environment on diseases in~~  
13 ~~later life, including childhood cancer.~~  
14  
15  
16

17 **Key words** the Apgar score at 5 minutes, cohort, developmental origins of disease, childhood cancer.  
18  
19  
20  
21  
22  
23  
24  
25  
26  
27  
28  
29  
30  
31  
32  
33  
34  
35  
36  
37  
38  
39  
40  
41  
42  
43  
44  
45  
46  
47  
48  
49  
50  
51  
52  
53  
54  
55  
56  
57  
58  
59  
60

250642012

INTRODUCTION

Childhood cancer is the second leading cause of deaths in children in high income countries, and it is of major concern for patients, families, and societies.<sup>1,2</sup> In spite of extensive research, little is known about the etiology of childhood cancer.<sup>1,2</sup> Almost half of childhood cancers are diagnosed before 5 year of age,<sup>1</sup> indicating that some of the causal factors operate in utero or in early postnatal life.<sup>3,4,3,4</sup> However, only few such risk factors have been identified.<sup>5</sup> Birth characteristics may represent the interactions between genetic susceptibility and prenatal environmental causes of cancer,<sup>6-8,6-8</sup> but the empirical evidence available to date is inconsistent and inconclusive.<sup>6-9,6-9</sup>

The Apgar score, which is assigned to virtually every newborn, which evaluates the clinical state of the newborns based on five physical signs (heart rate, respiratory effort, reflex irritability, muscle tone, and color) present shortly after birth.<sup>10,10</sup> A total score of 9 or 10 indicates that the baby is 'in its best possible condition'.<sup>10,10</sup> Although the usefulness of the Apgar score has been questioned in recent years,<sup>11,11</sup> this scoring system remains the only widely used and accepted tool for assessing the vitality of newborn infants across the world.<sup>12,13,12,13</sup> The five-minute Apgar score is a predictor of neonatal mortality,<sup>14,14</sup> and several neurological outcomes.<sup>15-19,15-19</sup> A suboptimal fetal environment<sup>20,20</sup> related to a low Apgar score may also be associated with compromised immune responses against tumors,<sup>21,21</sup> which can predict long-term human health problems,<sup>22,23,22,23</sup> including future cancer risk.

In this population-based cohort study, we examined the association between the Apgar score at five minutes of age and childhood cancer, after taking into account other birth characteristics,<sup>8,24,8,24</sup> maternal socio-demographic characteristics,<sup>1,2</sup> and maternal smoking during pregnancy.<sup>25,26,25,26</sup> into account. We hypothesized that children with a low Apgar score have a higher risk of childhood cancer than children with an optimal full Apgar score.<sup>21,21</sup>

Field Code Changed

Field Code Changed

Formatted: Do not check spelling or grammar, Superscript

Field Code Changed

Field Code Changed

Formatted: Do not check spelling or grammar, Superscript

Formatted: Do not check spelling or grammar, Superscript

Field Code Changed

250642012

## METHODS

### Study design and study population

Data from eight national registers in Sweden and Denmark were linked by the unique personal identification number, which is assigned to each resident in the Scandinavian countries.<sup>2727</sup> This population-based cohort study<sup>2828</sup> included all singleton children born in Denmark from 1978 to 2006 (N=1,7741,615477) and in Sweden from 1973 to 2006 (N=3,319,573624). Children were followed from birth until a cancer diagnosis, death, emigration, 14 years of age, or end of follow up (December 31<sup>st</sup>, 2006 in Sweden, December 31<sup>st</sup>, 2007 in Denmark), whichever came first. The 610 children who had both a birth defect and a cancer diagnosis were excluded, as some birth defects are closely associated with childhood cancers. The final study population included 5,091,188 children.

The Apgar score at 5 minutes of age and other birth characteristics (gestational age, birth weight, etc) were retrieved from Medical Birth Registers (MBR) in Denmark and in Sweden. The Danish Medical Birth Register was established in 1968<sup>2929</sup> and the Swedish Medical Birth Register in 1973 ([http://www.socialstyrelsen.se/Lists/Artikelkatalog/Attachments/10655/2003-112-3\\_20031123.pdf](http://www.socialstyrelsen.se/Lists/Artikelkatalog/Attachments/10655/2003-112-3_20031123.pdf)). These registers include data on practically all deliveries in Denmark and Sweden, respectively, and the information is collected from medical records in prenatal, delivery and neonatal care. It is compulsory for every health care provider to report to the registers.<sup>3030</sup>

Socio-demographic factors were obtained from the Danish Integrated Database for Longitudinal Labor Market Research (IDA), the Danish Civil Registry System, the Swedish Education Registry, and the Swedish Registry of Population and Population Changes.<sup>2828</sup>

### Outcome measurements



250642012

Data on cancer was obtained from national cancer registries, and the registration and coding practices have been described elsewhere.<sup>31, 32, 33</sup> The main outcomes of interest were all incident cancers (ICD-7 codes 104-205, ICD-10 codes C00-97) diagnosed before 15 years of age, and the most frequent childhood cancers for which uterine environment has been suggested to play a role:<sup>3, 4, 6-9, 4</sup> leukemias (ICD-7 code 204, ICD-10 codes C91-95), lymphomas ~~Hodgkin's lymphoma~~ (ICD-7 code 201-203, ICD-10 code C81-~~C85~~), brain and nervous system tumors (ICD-7 code 193, ICD-10 codes C70-C72, C47, C74.1), retinoblastoma (ICD-7 code 192 and PAD 436, ICD-10 code C69.2), Wilms' tumor (ICD-7 code 180 and PAD 886, ICD-10 code C64.9), non-Hodgkin's lymphoma (ICD-7 codes 200, 202, ICD-10 codes C82-83), Hepatoblastoma ~~tumors~~ (ICD-7 code 155, ICD-10 code C22), malignant bone tumors (ICD-7 code 196, ICD-10 codes C40-C41), and testicular ~~testicular~~ cancer (ICD-7 code 178, ICD-10 code C62), Wilm's tumor (ICD-7 code 180 and PAD 886, ICD-10 code C64.9), retinoblastoma of the eye (ICD-7 code 192 and PAD 436, ICD-10 code C69.2), and central nervous system (CNS) tumors (ICD-7 code 193, ICD-10 codes C70-71).

### Statistical analysis

All data handling and statistical analyses were performed using SAS version 9.2 statistical software package (SAS Institute, Inc., Cary, North Carolina). The low Apgar score was categorized into each single score and also into 2 subgroups (0-5 and 6-8), as a very low score would be different from a score of over 5.<sup>10+0</sup> Hazards ratios with 95% confidence intervals were estimated by Cox regression with the PHREG procedure. Potential confounders were included in the model, such as country (Denmark, Sweden), child sex (male, female) and birth characteristics ((parity (1, 2, ≥3), birth weight (<2500 g, 2500-3249 g, 3250-3999 g, and ≥4000 g), gestational age (<37 weeks and ≥37 weeks)), maternal factors ((age (≤26 years, 27-30 years, and ≥31 years), education level (low: ≤9 years,

Field Code Changed

Formatted: Do not check spelling or grammar, Superscript

Field Code Changed

1  
2  
3  
4  
5  
6  
7 | ~~2506~~2012  
8  
9

10 middle: 10-14 years, and high:  $\geq 15$  years) (available Swedish data from 1990, 1995, 2000, and 2005,  
11 available annual Danish data from 1978-2006)<sup>2929</sup> ~~),~~ -smoking during pregnancy (yes, no) (available  
12 1991-2007 in Denmark and 1983-2006 in Sweden)).  
13  
14

15 Analyses were ~~also performed when we excluded children diagnosed with cancer before 6~~  
16 ~~months of age to see how the overall effect of a low Apgar score would change when most embryonic~~  
17 ~~cancers are excluded. We also repeated our analyses by dropping Wilms' tumor, hepatoblastoma,~~  
18 ~~testicular cancer, and retinoblastoma to see how the overall effect would be driven by these 4~~  
19 ~~childhood cancers.~~  
20  
21  
22  
23  
24

25 Analyses were also stratified by country, sex, birth weight, gestational age, and parity, which  
26 have been suggested to be associated with both Apgar score and cancer risk.<sup>1,2</sup> Analyses were also  
27 performed for the sub-cohorts where information on maternal smoking was available.  
28  
29

30 ~~stratified by country, sex, birth weight, gestational age, and parity, which have been suggested~~  
31 ~~to be associated with both Apgar score and cancer risk.<sup>1,2</sup> Analyses were also performed for the sub-~~  
32 ~~cohorts where information on maternal smoking was available.~~  
33  
34  
35  
36  
37  
38  
39  
40  
41  
42  
43  
44  
45  
46  
47  
48  
49  
50  
51  
52  
53  
54

55  
56  
57  
58  
59  
60  
7

Field Code Changed

250642012

## RESULTS

The baseline characteristics of the study population (5,061,798 singletons) are shown in Table 1 according to the 3 subgroups of Apgar scores (0 to 5, 6-8, and 9-10). Low Apgar scores were

~~comparable for most characteristics but more frequent common among boys, first born children, children born preterm or with low birth weight, children born to mothers with lower education or to mothers who smoked during pregnancy.~~

A total of ~~8087697~~ children were diagnosed with cancer before 14 years of age (1.67 per 1000 children). Table 2 presents that children with a score of 0 to 5 had a higher overall rate of childhood cancer (2.03 per 1000) than those with a score of 6 to 8 (12.70 per 1000), and those with a score of 9 to 10 (1.67 per 1000). Compared to children with a five-minute Apgar score of 9-10, children with a score of 0-5 had a 4650% increased risk of cancer before 14 years of age (adjusted Hazard ratio (HR) 1.4650, 95% confidence interval (CI) 1.159-1.8989), ~~but not and~~ children with a score of 6-8 had no increased risk of cancer ~~had a 14% increased risk~~ (HR -1.0514, 95% CI 01.902-1.128).

Table 3 shows that the HRs in children according to age at cancer diagnosis. For cancer diagnosed before 6 months of age, an with a low Apgar score of 0-5 was associated with 6-fold overall risk (HR 6.04, 95% CI 3.73-9.76) and an Apgar - ~~For estimate for a score of 6-8 was associated with a two-fold increase in risk (HR 2.17, (95% CI 1.54-3.05)ere higher in almost all strata, according to country, child's sex and birth characteristics (birth weight, gestational age, and birth order), and maternal factors (age, education, and smoking status during pregnancy). The most frequent diagnosed cancers during this period include tumors from brain/nervous system, endocrinal glands, kidney, and leukemia/lymphomas (data not shown). There were no statistically significant increased risks for cancer diagnosed aftert age of 6 months of age to 5 years and at age older than 5 years.~~

250642012

Compared to children with an [Apgar](#) score of 9-10, children with a score of 0-5 had higher risks for several ~~main~~ childhood cancers (CNS tumors, retinoblastoma, hepatic tumors, bone tumors, and testicular tumors), but most estimates were not statistically significant (Table 4). Low Apgar scores did not influence risks of lymphatic / hemapoietic neoplasms. The highest HR was observed in children with a score of 0-5 for Wilms' tumor (HR 4.3378, 95% CI 2.4279-78.7349).

~~When Wilms' tumor, testicular cancer, hepatic cancer, and retinoblastoma were not included in the analyses, the estimates for overall effect of a low Apgar score are smaller but the risks remain elevated (data not shown). With these exclusions, ~~And~~ the estimates for cancer diagnosed before 6 months were even slightly higher (data not shown) than those presented in Table 3, compared to those presented in Table 3. When we excluded cancers diagnosed during the first 6 months of life, the effect of a low Apgar score was not associated with increased ~~on~~ overall cancer risk or was not significant and neither for with CNS cancer-CNS and nervous system (data not shown). ~~But~~ the estimates for other cancers, such as Wilms' tumor, remained essentially unchanged ~~did not change~~ much (data not shown).~~

The ~~elevated risks related to HRs in children with an~~ [Apgar](#) score of 0-5 were higher in almost all ~~each~~ stratum, of the covariates, such as country (Denmark, Sweden), child sex (male, female) and birth characteristics ((parity (1, 2, ≥3), birth weight (<2500 g, 2500-3249 g, 3250-3999 g, and ≥4000 g), gestational age (<37 weeks and ≥37 weeks)), maternal factors ((age (<26 years, 27-30 years, and ≥31 years), education level (low: <9 years, middle: 10-14 years, and high: ≥15 years),<sup>29</sup> and smoking during pregnancy (yes, no))(data not shown).

1  
2  
3  
4  
5  
6  
7 | [250642012](#)  
8  
9

10 | ~~according to country, child's sex and birth characteristics (birth weight, gestational age, and~~  
11 ~~birth order), and maternal factors (age, education, and smoking status during pregnancy) (data not~~  
12 ~~shown).~~  
13  
14  
15  
16  
17  
18  
19  
20  
21  
22  
23  
24  
25  
26  
27  
28  
29  
30  
31  
32  
33  
34  
35  
36  
37  
38  
39  
40  
41  
42  
43  
44  
45  
46  
47  
48  
49  
50  
51  
52  
53  
54  
55  
56  
57  
58  
59  
60

10

250642012

## DISCUSSION

Children with a low 5-minute Apgar score, especially children with a score of 0 to 5, had a higher overall risk of childhood cancer that was diagnosed before 6 months of age. We also observed and higher risks for several main childhood cancers like. The association was independent of country, child sex, child birth characteristics (birth weight, birth order, and gestational age), and maternal factors (age, education, and smoking during pregnancy). Similar associations were seen for most childhood cancers, albeit the estimate was only statistically significant for Wilms' tumor. The associations were independent of country, child sex, child birth characteristics (birth weight, birth order, and gestational age), and maternal factors (age, education, and smoking during pregnancy). However, we found no association between low Apgar score and risk of leukemia and other lymphatic / hemapoietic malignancies.

The theory of 'developmental-origins of health and disease' proposes the importance of in utero environment for long-term human health.<sup>22, 23, 23</sup> We observed that children with a low any Apgar score (between 0 and 8 at 5 minutes, and especially those with a score between 0 to 5); had a higher overall cancer risk than those with an optimal score (of 9 or 10). The mechanism underlying this observation is, however, unclear. It should be noted that the Apgar score is a sum of 5 signs (rating 0 to 2), which are not of equal value.<sup>10, 13</sup> A low Apgar score is a marker of a suboptimal fetal environment<sup>20</sup> or other factors that prevent the child from achieving a high score. From or a suboptimal fetal environment<sup>20, 20</sup> that may have a programming perspective, i effect on the development of childhood cancer. It is interesting to observe that the effect of a low Apgar score on overall cancer risk was the strongest for cancers diagnosed before 6 months of age. Tumors from brain/nervous system, endocrinal glands, kidney, and leukemia/lymphomas were among the most frequent diagnosed cancers during this

Field Code Changed

Field Code Changed

250642012

period. This observation is in line with suggestions from previous studies that ~~While in utero~~ exposures to insulin-like growth factors,<sup>8</sup> estrogens,<sup>33, 34, 33, 34</sup> or infections<sup>24, 35, 24, 35</sup> may play a role for ~~have been proposed to explain~~ the relationships between ~~most of~~ other birth outcomes and ~~many~~ childhood cancers, ~~or childhood cancer risk in general. A low Apgar score probably shares the etiology with those cancers initiated developed in fetalus life, and d. It should be noted that the Apgar score is a sum of 5 signs (rating 0 to 2), which are not of equal value.~~<sup>10, 13</sup> ~~D~~ different biological pathways may operate for the association between ~~the~~ Apgar score and childhood cancers. ~~For example, it can also be hypothesized that~~ neonatal treatments related to low Apgar scores may increase the risk of some childhood cancers.<sup>36, 37, 36, 37</sup>

~~The observed associations between low Apgar scores and childhood cancer risk were not explained by the role of other adverse birth outcomes, which have been widely used as the proxy indicators of fetal environment to explain fetal origins for a number of adult diseases.~~<sup>22, 23</sup> ~~As expected, a low Apgar score was more common among children with adverse birth outcomes, which often correlate with childhood cancer.~~<sup>6-9</sup> ~~However, the elevated risks related to a low score were observed in almost all subgroups, not restricted to adverse birth outcomes. Furthermore, the associations were consistent according to country and maternal factors under investigation.~~

The best evidence for fetal origins of childhood cancer has been available for leukemia.<sup>7, 8, 38-8</sup> ~~But~~ our findings suggest that those observations may operate through the mechanisms that do not affect the Apgar score, ~~and s.~~ Similar interpretations apply to other lymphatic / hemopoietic neoplasms, ~~and CNS tumors~~. The associations between a low Apgar score and several ~~other~~ specific childhood cancers in our study are noteworthy. For example, the highest risk of a low Apgar score was obtained for Wilms' tumor, which is in line with observations in two register-based studies (restricted to only

Field Code Changed

250642012

girls in one of the studies)<sup>39,40,38,39</sup> but not in another case-control study.<sup>41,40</sup> Hypoxia, as indicated by a low score, may result in cell damage that subsequently leads to Wilms' tumor.<sup>42,43,41,42</sup> Alternatively, neonatal treatments provided to neonates with a low Apgar score may also increase the risk of Wilms' tumor.<sup>36,37,36,37</sup> Hepatoblastoma is reported to be associated with factors like low birth weight,<sup>44,43</sup> smoking during pregnancy or young maternal age.<sup>45,44</sup> A recent study showed a reverse association between birth order and retinoblastoma.<sup>99</sup> However, the observed elevated risks of both hepatoblastoma and retinoblastoma after adjustment might indicate an independent role of a low Apgar score for these two childhood cancers.

The observed associations between low Apgar scores and childhood cancer risk were not explained by the role of other adverse birth outcomes, which have been widely used as the proxy indicators of fetal environment to explain fetal origins for a number of adult diseases.<sup>22,23</sup> As expected, a low Apgar score was more common among children with adverse birth outcomes, which often correlate with childhood cancers.<sup>7-9,38</sup> However, the elevated risks related to a low score were observed in almost all subgroups of baseline characteristics, including but not restricted to pregnancies with adverse birth outcomes. Furthermore, the associations were consistent according to country and maternal factors under investigation.

The most important strengths of our study include the singletons in a prospectively longitudinal design, large sample size, complete follow up, and detailed data on other covariates. The registry system in the Nordic countries provides both a complete case ascertainment and accurate linkage with other data, which allow complete follow up with least impact of misclassification error.<sup>27</sup> The rarity of childhood cancer makes population-based epidemiological studies very difficult. Much of the heterogeneity of previous results might be due to the small sample sizes and lack of control for both factors related to the child and the mother. Our data enabled us to do a more in-depth investigation

Field Code Changed



1  
2  
3  
4  
5  
6  
7 | ~~2506~~2012  
8  
9

10 | by examining ~~the~~risks in subgroups. The cohort design based on prospectively collected high quality  
11 | data minimized the impact of information ~~bias~~ or recall bias. ~~The registry system in the Nordic~~  
12 | ~~countries provides both a complete case ascertainment and accurate linkage with other data, which~~  
13 | ~~allow complete follow up with least impact of misclassification error.~~<sup>2727</sup>  
14  
15  
16

Field Code Changed

17  
18 | One limitation of our study is that we lack information on risk factors after birth. However,  
19 | factors associated with a low Apgar score, such as related neonatal treatments, may lie in the pathways  
20 | between exposure and outcome, and should not necessarily be controlled for in the analyses.<sup>4645</sup> ~~-A~~  
21 | ~~s~~Second limitation is that we cannot rule out the confounding of factors like environmental exposures  
22 | after birth. Third~~ly~~, the case numbers for several childhood cancers are small, although the total  
23 | population included over 5 million children.  
24  
25  
26  
27

Field Code Changed

28  
29 | To conclude, our findings support the developmental-origins hypothesis of childhood cancer.  
30 | An association between a low Apgar score and childhood cancer does not prove a causal role of the  
31 | components that make up the Apgar score but ~~it will further~~strengthens the relevance of viewing the  
32 | prenatal time period as a causal time window of interest. A low Apgar score may reflect a pathologic  
33 | pregnancy which could share causes with childhood cancers, or childhood cancers may have a clinical  
34 | onset that starts during fetal life. In the first situation, a low Apgar score may also be associated with  
35 | cancer risk in adulthood. In addition to being a widely accepted assessment tool in neonatal care, the  
36 | Apgar score may indicate programming effects of fetal environment on further health, suggesting that  
37 | its role in clinical practice and public health may reach beyond its current use.  
38  
39  
40  
41  
42  
43  
44  
45

46  
47 | **Funding** This work was supported by a grant to Dr. Jiong Li from the European Research Council  
48 | (ERC-2010-StG no. 260242, the European Union Seventh Framework Programme (EU FP7)); and the  
49 | Nordic Cancer Union (2008); and the NordForsk (070331); the Danish Medical Research Council  
50  
51  
52

1  
2  
3  
4  
5  
6  
7 | [250642012](#)  
8  
9

10 (projects no. 09-060229, 09-063494, and 09-072986); and the Swedish Council for Working Life and  
11 Social Research (Grant no. 2010-0092).

12  
13 **Competing Interests** None.

14  
15 **Contributors** JL conceived the research, analysed the data and wrote the first draft of the manuscript.  
16 JL, SC, MG, MV, CO, JA, and JO contributed to data analysis, interpretation of results, and critical  
17 revision of the manuscript. All authors approved the final manuscript.  
18  
19

20  
21 **Ethics approval** The study was approved by Danish Data Protection Agency (j nr. 2008-41-2680),  
22 Scientific Ethics Committee of Central Region Jylland (VEK, sagnr. M-20100252), Research Ethics  
23 Committee (EPN) at Karolinska Institutet (Ref no. 2008 /4:6).  
24  
25

26  
27 **Patient consent** not needed for register-based research according to laws in Denmark and Sweden.

28  
29 **Provenance and peer review** Not commissioned; externally peer reviewed.

30  
31 **Data sharing statement** There are no additional data available.  
32  
33  
34  
35  
36  
37  
38  
39  
40  
41  
42  
43  
44  
45  
46  
47  
48  
49  
50

51 **ARTICLE SUMMARY**  
52  
53  
54  
55  
56  
57  
58  
59  
60

1  
2  
3  
4  
5  
6  
7 | [25064](#)2012  
8  
9  
10

#### 11 **Article focus**

- 13 • The etiology of childhood cancer remains largely unknown but recent research indicates that  
14 uterine environment plays an important role.
- 15 • The Apgar score may have more implications than its role in current clinical practice  
16  
17

#### 18 **Key messages**

- 19 • A low five-minute Apgar score was associated with a higher risk of childhood cancer, suggesting  
20 that environmental factors operating before or during delivery may play a causal role.  
21  
22
- 23 • In addition to as an assessment tool for a newborn's clinical status, the Apgar score at 5 minutes  
24 may also indicate programming effect of fetal environment on diseases in later life, including  
25 childhood cancer.  
26  
27  
28

#### 29 **Strengths and limitation of this study**

- 30 • The most important strengths of our study include singletons in a prospectively longitudinal design,  
31 large sample size of 5 million, complete follow up, accurate data on [Apgar score exposure](#) and  
32 [cancer diagnosis outcome](#), and detailed data on covariates.  
33  
34
- 35 • The limitations of our study are that we lack information on risk factors after birth and the case  
36 numbers for several childhood cancers are small.  
37  
38  
39  
40  
41  
42  
43  
44  
45  
46  
47  
48  
49  
50  
51  
52  
53  
54  
55  
56  
57  
58  
59  
60

250642012

## REFERENCES

1. [Kaatsch P. Epidemiology of childhood cancer. \*Cancer Treat Rev\* 2010;36:277-285.](#)
2. [Parkin DM, Whelan S, Ferlay J, Thomas DB. Cancer Incidence in Five Continents VIII. IARC Scientific Publications. 2002. Lyon, France, IARC.](#)
3. [Anderson LM. Environmental genotoxicants/carcinogens and childhood cancer: Bridgeable gaps in scientific knowledge. \*Mutat Res\* 2006;608:136-156.](#)
4. [Kimmel GL. An overview of children as a special population--Relevance to predictive biomarkers. \*Toxicol Appl Pharmacol\* 2005;206:215-218.](#)
5. [Garner MJ, Turner MC, Ghadirian P, Krewski D. Epidemiology of testicular cancer: an overview. \*Int J Cancer\* 2005;116:331-339.](#)
6. [Greaves M. Molecular genetics, natural history and the demise of childhood leukaemia. \*Eur J Cancer\* 1999;35:1941-1953.](#)
7. [Ma X, Metayer C, Does MB, Buffler PA. Maternal pregnancy loss, birth characteristics, and childhood leukemia \(United States\). \*Cancer Causes Control\* 2005;16:1075-1083.](#)
8. [Tower RL, Spector LG. The epidemiology of childhood leukemia with a focus on birth weight and diet. \*Crit Rev Clin Lab Sci\* 2007;44:203-242.](#)
9. [Von Behren J, Spector LG, Mueller BA et al. Birth order and risk of childhood cancer: A pooled analysis from five US States. \*Int J Cancer\* 2011;128:2709-2716.](#)
10. [APGAR V. A proposal for a new method of evaluation of the newborn infant. \*Curr Res Anesth Analg\* 1953;260-267.](#)
11. [No authors listed. Use and abuse of the Apgar score. Committee on Fetus and Newborn, American Academy of Pediatrics, and Committee on Obstetric Practice. American College of Obstetricians and Gynecologists. \*Pediatrics\* 1996;98:141-142.](#)
12. [Finster MMD, Wood MMD. The Apgar Score Has Survived the Test of Time. \*Anesthesiology\* 2005;102:855-857.](#)
13. [Papile LA. The Apgar Score in the 21st Century. \*N Engl J Med\* 2001;344:519-520.](#)
14. [Casey BM, McIntire DD, Leveno KJ. The Continuing Value of the Apgar Score for the Assessment of Newborn Infants. \*N Engl J Med\* 2001;344:467-471.](#)
15. [Li J, Olsen J, Vestergaard M, Obel C. Low Apgar Scores and Risk of Childhood Attention Deficit Hyperactivity Disorder. \*J Pediatr\* 2011;158:775-779.](#)

Formatted: Space After: 12 pt

Formatted: Space After: 12 pt

250642012

16. [Moster D, Lie RT, Irgens LM, Bjerkedal T, Markestad T. The association of Apgar score with subsequent death and cerebral palsy: A population-based study in term infants. J Pediatrics 2001;138:798-803.](#)
17. [Odd DE, Rasmussen F, Gunnell D, Lewis G, Whitelaw A. A cohort study of low Apgar scores and cognitive outcomes. Arch Dis Child Fetal Neonatal Ed 2008;93:F115-F120.](#)
18. [Stuart A, Olausson PO, Kallen K. Apgar scores at 5 minutes after birth in relation to school performance at 16 years of age. Obstet Gynecol 2011;118:201-208.](#)
19. [Sun Y, Vestergaard M, Pedersen CB, Christensen J, Olsen J. Apgar scores and long-term risk of epilepsy. Epidemiology 2006;17:296-301.](#)
20. [Gilstrap LC, III, Hauth JC, Hankins GD, Beck AW. Second-stage fetal heart rate abnormalities and type of neonatal acidemia. Obstet Gynecol 1987;70:191-195.](#)
21. [Ekblom A. The developmental environment and the early origins of cancer. In: Gluckman P, Hanson M, editors. Developmental origins of health and disease. Cambridge: Cambridge University Press; 2006:415-425.](#)
22. [Gluckman PD, Hanson MA. Living with the Past: Evolution, Development, and Patterns of Disease. Science 2004;305:1733-1736.](#)
23. [Gluckman PD, Hanson MA, Cooper C, Thornburg KL. Effect of In Utero and Early-Life Conditions on Adult Health and Disease. N Engl J Med 2008;359:61-73.](#)
24. [Greaves M. Childhood leukaemia. BMJ 2002;324:283-287.](#)
25. [Okasha M, McCarron P, Gunnell D, Smith GD. Exposures in childhood, adolescence and early adulthood and breast cancer risk: a systematic review of the literature. Breast Cancer Res Treat 2003 2003;78:223-276.](#)
26. [Park SK, Kang D, McGlynn KA et al. Intrauterine environments and breast cancer risk: meta-analysis and systematic review. Breast Cancer Res 2008 2008;10:R8.-Epub 2008.](#)
27. [Frank L. Epidemiology. When an entire country is a cohort. Science 2000;287:2398-2399.](#)
28. [Li J, Vestergaard M, Obel C, Cnattingus S, Gissler M, Olsen J. Cohort Profile: The Nordic Perinatal Bereavement Cohort. Int J Epidemiol 2010;40:1161-1167.](#)
29. [Knudsen LB, Olsen J. The Danish Medical Birth Registry. Dan Med Bull 1998;45:320-323.](#)
30. [Axelsson O. The Swedish Medical Birth Register. Acta Obstetrica et Gynecologica Scandinavica 2003;82:491-492.](#)

250642012

31. [Barlow L, Westergren K, Holmberg L, Talbäck M. The completeness of the Swedish Cancer Register: a sample survey for year 1998. Acta Oncol 2009;48:27-33.](#)
32. [Gjerstorff ML. The danish cancer registry. Scand J Public Health 2011;39:42-45.](#)
33. [Petridou E, Panagiotopoulou K, Katsouyanni K, Spanos E, Trichopoulos D. Tobacco smoking, pregnancy estrogens, and birth weight. Epidemiology 1990;1:247-250.](#)
34. [Liehr JG. Is estradiol a genotoxic mutagenic carcinogen? Endocr Rev 2000;21:40-54.](#)
35. [Law GR. Host, family and community proxies for infections potentially associated with leukaemia. Radiat Prot Dosimetry 2008;132:267-272.](#)
36. [Sadetzki S, Mandelzweig L. Childhood exposure to external ionising radiation and solid cancer risk. Br J Cancer 2009;100:1021-1025.](#)
37. [Spector LG, Klebanoff MA, Feusner JH, Georgieff MK, Ross JA. Childhood Cancer Following Neonatal Oxygen Supplementation. The Journal of Pediatrics 2005;147:27-31.](#)
38. [Greaves M. Molecular genetics, natural history and the demise of childhood leukaemia. Eur J Cancer 1999 Feb 1995;31:173-185.](#)
39. [Heuch JM, Heuch I, Kvale G. Birth characteristics and risk of Wilms' tumour: a nationwide prospective study in Norway. Br J Cancer 1996;74:1148-1151.](#)
40. [Schuz J, Schmidt LS, Kogner P et al. Birth characteristics and Wilms tumors in children in the Nordic countries: A register-based case-control study. Int J Cancer 2011;128:2166-2173.](#)
41. [Puumala SE, Soler JT, Johnson KJ, Spector LG. Birth characteristics and Wilms tumor in Minnesota. Int J Cancer 2008;122:1368-1373.](#)
42. [Ruan K, Song G, Ouyang G. Role of hypoxia in the hallmarks of human cancer. J Cell Biochem 2009;107:1053-1062.](#)
43. [Rankin EB, Giaccia AJ. The role of hypoxia-inducible factors in tumorigenesis. Cell Death Differ 2008;15:678-685.](#)
44. [Reynolds P, Urayama KY, Von Behren J, Feusner J. Birth characteristics and hepatoblastoma risk in young children. Cancer 2004;100:1070-1076.](#)
45. [McLaughlin CC, Baptiste MS, Schymura MJ, Nasca PC, Zdeb MS. Maternal and Infant Birth Characteristics and Hepatoblastoma. Am J Epidemiol 2006;163:818-828.](#)
46. [Rothman KJ, Greenland S, Lash TL. Modern Epidemiology. Third ed. Philadelphia: Lippincott Williams & Wilkins; 2008.](#)

Formatted: Font: Symbol, Not Bold, Do not check spelling or grammar

Formatted: Indent: Left: 0", Hanging: 0.38", Line spacing: single, Tab stops: 0.25", Right + 0.38", Left + Not at 0"

250642012

- ~~1. Kaatsch P. Epidemiology of childhood cancer. *Cancer Treat Rev* 2010;36:277-285.~~
- ~~2. Parkin DM, Whelan S, Ferlay J, Thomas DB. Cancer Incidence in Five Continents VIII. IARC Scientific Publications. 2002. Lyon, France, IARC.~~
- ~~3. Lucy M. Environmental genotoxicants/carcinogens and childhood cancer: Bridgeable gaps in scientific knowledge. *Mutation Research/Genetic Toxicology and Environmental Mutagenesis* 2006;608:136-156.~~
- ~~4. Gary L. An overview of children as a special population—Relevance to predictive biomarkers. *Toxicology and Applied Pharmacology* 2005;206:215-218.~~
- ~~5. Garner MJ, Turner MC, Ghadirian P, Krewski D. Epidemiology of testicular cancer: an overview. *Int J Cancer* 2005;116:331-339.~~
- ~~6. Greaves M. Molecular genetics, natural history and the demise of childhood leukaemia. *Eur J Cancer* 1999 Feb 19;35:173-185.~~
- ~~7. Ma X, Metayer C, Does MB, Buffler PA. Maternal pregnancy loss, birth characteristics, and childhood leukemia (United States). *Cancer Causes Control* 2005;16:1075-1083.~~
- ~~8. Tower RL, Spector LG. The epidemiology of childhood leukemia with a focus on birth weight and diet. *Crit Rev Clin Lab Sci* 2007;44:203-242.~~
- ~~9. Von Behren J, Spector LG, Mueller BA et al. Birth order and risk of childhood cancer: A pooled analysis from five US States. *Int J Cancer* 2011;128:2709-2716.~~
- ~~10. APGAR V. A proposal for a new method of evaluation of the newborn infant. *Curr Res Anesth Analg* 1953;2:260-267.~~
- ~~11. No authors listed. Use and abuse of the Apgar score. Committee on Fetus and Newborn, American Academy of Pediatrics, and Committee on Obstetric Practice, American College of Obstetricians and Gynecologists. *Pediatrics* 1996;98:141-142.~~
- ~~12. Finster MMD, Wood MMD. The Apgar Score Has Survived the Test of Time. *Anesthesiology* 2005;102:855-857.~~
- ~~13. Papile LA. The Apgar Score in the 21st Century. *N Engl J Med* 2001;344:519-520.~~
- ~~14. Casey BM, McIntire DD, Leveno KJ. The Continuing Value of the Apgar Score for the Assessment of Newborn Infants. *N Engl J Med* 2001;344:467-471.~~
- ~~15. Li J, Olsen J, Vestergaard M, Obel C. Low Apgar Scores and Risk of Childhood Attention Deficit Hyperactivity Disorder. *J Pediatr* 2011;158:775-779.~~

250642012

- ~~16. Moster D, Lie RT, Irgens LM, Bjerkedal T, Markestad T. The association of Apgar score with subsequent death and cerebral palsy: A population based study in term infants. *J Pediatr* 2001;138:798-803.~~
- ~~17. Odd DE, Rasmussen F, Gunnell D, Lewis G, Whitelaw A. A cohort study of low Apgar scores and cognitive outcomes. *Arch Dis Child Fetal Neonatal Ed* 2008;93:F115-F120.~~
- ~~18. Stuart A, Olausson PO, Kallen K. Apgar scores at 5 minutes after birth in relation to school performance at 16 years of age. *Obstet Gynecol* 2011;118:201-208.~~
- ~~19. Sun Y, Vestergaard M, Pedersen CB, Christensen J, Olsen J. Apgar scores and long-term risk of epilepsy. *Epidemiology* 2006;17:296-301.~~
- ~~20. Gilstrap LC, III, Hauth JC, Hankins GD, Beck AW. Second stage fetal heart rate abnormalities and type of neonatal acidemia. *Obstet Gynecol* 1987;70:191-195.~~
- ~~21. Ekblom A. The developmental environment and the early origins of cancer. In: Gluckman P, Hanson M, editors. *Developmental origins of health and disease*. Cambridge: Cambridge University Press; 2006:415-425.~~
- ~~22. Gluckman PD, Hanson MA. Living with the Past: Evolution, Development, and Patterns of Disease. *Science* 2004;305:1733-1736.~~
- ~~23. Gluckman PD, Hanson MA, Cooper C, Thornburg KL. Effect of In Utero and Early Life Conditions on Adult Health and Disease. *N Engl J Med* 2008;359:61-73.~~
- ~~24. Greaves M. Childhood leukaemia. *BMJ* 2002;324:283-287.~~
- ~~25. Okasha M, McCarron P, Gunnell D, Smith GD. Exposures in childhood, adolescence and early adulthood and breast cancer risk—a systematic review of the literature. *Breast Cancer Res Treat* 2003-2003;78:223-276.~~
- ~~26. Park SK, Kang D, McGlynn KA et al. Intrauterine environments and breast cancer risk: meta-analysis and systematic review. *Breast Cancer Res* 2008;10:R8.~~
- ~~27. Frank L. Epidemiology. When an entire country is a cohort. *Science* 2000;287:2398-2399.~~
- ~~28. Li J, Vestergaard M, Obel C, Cnattingus S, Gissler M, Olsen J. Cohort Profile: The Nordic Perinatal Bereavement Cohort. *Int J Epidemiol* 2010;40:1161-1167.~~
- ~~29. Knudsen LB, Olsen J. The Danish Medical Birth Registry. *Dan Med Bull* 1998;45:320-323.~~
- ~~30. Axelsson O. The Swedish Medical Birth Register. *Acta Obstetrica et Gynecologica Scandinavica* 2003;82:491-492.~~
- ~~31. Barlow L, Westergren K, Holmberg L, Talback M. The completeness of the Swedish Cancer Register: a sample survey for year 1998. *Acta Oncol* 2009;48:27-33.~~

Formatted: Danish



250642012

- ~~32. Gjerstorff ML. The danish cancer registry. Scand J Public Health 2011;39:42-45.~~
- ~~33. Petridou E, Panagiotopoulou K, Katsouyanni K, Spanos E, Trichopoulos D. Tobacco smoking, pregnancy estrogens, and birth weight. Epidemiology 1990;1:247-250.~~
- ~~34. Liehr JG. Is estradiol a genotoxic mutagenic carcinogen? Endocr Rev 2000;21:40-54.~~
- ~~35. Law GR. Host, family and community proxies for infections potentially associated with leukaemia. Radiat Prot Dosimetry 2008;132:267-272.~~
- ~~36. Sadetzki S, Mandelzweig L. Childhood exposure to external ionising radiation and solid cancer risk. Br J Cancer 0 AD;100:1021-1025.~~
- ~~37. Spector LG, Klebanoff MA, Feusner JH, Georgieff MK, Ross JA. Childhood Cancer Following Neonatal Oxygen Supplementation. J Pediatrics 2005;147:27-31.~~
- ~~38. Heuch JM, Heuch I, Kvale G. Birth characteristics and risk of Wilms' tumour: a nationwide prospective study in Norway. Br J Cancer 1996;74:1148-1151.~~
- ~~39. Schuz J, Schmidt LS, Kogner P et al. Birth characteristics and Wilms tumors in children in the Nordic countries: A register-based case-control study. Int J Cancer 2011;128:2166-2173.~~
- ~~40. Puumala SE, Soler JT, Johnson KJ, Spector LG. Birth characteristics and Wilms tumor in Minnesota. Int J Cancer 2008;122:1368-1373.~~
- ~~41. Ruan K, Song G, Ouyang G. Role of hypoxia in the hallmarks of human cancer. J Cell Biochem 2009;107:1053-1062.~~
- ~~42. Rankin EB, Giaccia AJ. The role of hypoxia-inducible factors in tumorigenesis. Cell Death Differ 2008;15:678-685.~~
- ~~43. Reynolds P, Urayama KY, Von Behren J, Feusner J. Birth characteristics and hepatoblastoma risk in young children. Cancer 2004;100:1070-1076.~~
- ~~44. McLaughlin CC, Baptiste MS, Schymura MJ, Nasca PC, Zdeb MS. Maternal and Infant Birth Characteristics and Hepatoblastoma. Am J Epidemiol 2006;163:818-828.~~
- ~~45. Rothman KJ, Greenland S, Lash TL. Modern Epidemiology. Third ed. Philadelphia: Lippincott Williams & Wilkins; 2008.~~

Formatted: Danish

250642012

Table 1. Baseline characteristics of the study population according to the Apgar score \*

| Variables              | Apgar score at 5 minutes |                  |                       |                 |
|------------------------|--------------------------|------------------|-----------------------|-----------------|
|                        | 0-5                      | 6-8              | 9-10                  | Unknown         |
| <b>Country</b>         |                          |                  |                       |                 |
| Denmark                | 10,6737 (132)            | 42,11851 (27)    | 1,669,95670,475 (936) | 189,86874 (18)  |
| Sweden                 | 22,6948 (168)            | 116,1677 (473)   | 2,951,0693 (9064)     | 229,64953 (792) |
| <b>Sex</b>             |                          |                  |                       |                 |
| Boys                   | 18,82934 (156)           | 8990,97003 (357) | 2,3656,951258 (951)   | 126,0114 (54)   |
| Girls                  | 14,53740 (144)           | 68,3125 (43)     | 2,255,068310 (9249)   | 122,50613 (549) |
| <b>Birth order</b>     |                          |                  |                       |                 |
| 1                      | 16,9105 (51)             | 91,199222 (458)  | 1,971,064289 (9043)   | 100,23942 (540) |
| 2                      | 93889 (128)              | 42,29300 (27)    | 1,6945,866084 (9237)  | 93,2328 (538)   |
| ≥3                     | 57823 (17)               | 23,0919 (215)    | 89984,631716 (9219)   | 4848,4047 (519) |
| Unknown                | 12878 (24)               | 17057 (21)       | 60,45879 (861)        | 6646 (93)       |
| <b>Gestational age</b> |                          |                  |                       |                 |

250642012

|                         |                                            |                                          |                                              |                                          |
|-------------------------|--------------------------------------------|------------------------------------------|----------------------------------------------|------------------------------------------|
| <37 weeks               | 890 <del>23</del> ( <del>427</del> )       | 27,3 <del>348</del> ( <del>117</del> )   | 191,5 <del>5287</del> ( <del>794</del> )     | 14,4 <del>3941</del> (6)                 |
| >=37 weeks              | 22,99 <del>07</del> ( <del>&lt;169</del> ) | 129,2 <del>3870</del> ( <del>382</del> ) | 4,368, <del>046538</del> ( <del>925</del> )  | 226,6 <del>6876</del> ( <del>591</del> ) |
| Unknown                 | 1475 ( <del>24</del> )                     | 174 <del>02</del> ( <del>21</del> )      | 61,4 <del>2143</del> ( <del>851</del> )      | 7410 ( <del>103</del> )                  |
| <b>Birth weight (g)</b> |                                            |                                          |                                              |                                          |
| <2500                   | 82 <del>3840</del> (25)                    | 22,4 <del>895</del> (134)                | 135, <del>895925</del> ( <del>763</del> )    | 11,15 <del>02</del> (64)                 |
| 2500-3249               | 7766 ( <del>123</del> )                    | 39,8 <del>2438</del> ( <del>325</del> )  | 1,137, <del>398533</del> ( <del>9125</del> ) | 62, <del>399402</del> (25)               |
| 3250-3999               | 10,99 <del>48</del> ( <del>&lt;133</del> ) | 65,6 <del>6983</del> ( <del>241</del> )  | 2,448, <del>691948</del> ( <del>9253</del> ) | 128,26 <del>79</del> (52)                |
| >=4000                  | 434 <del>01</del> ( <del>&lt;113</del> )   | 27,7 <del>3642</del> ( <del>318</del> )  | 833, <del>472578</del> ( <del>9218</del> )   | 37,49 <del>79</del> ( <del>415</del> )   |
| Unknown                 | 20 <del>2930</del> (36)                    | 25 <del>6770</del> (32)                  | 65,5 <del>6384</del> ( <del>831</del> )      | 920 <del>45</del> (124)                  |
| <b>Maternal age</b>     |                                            |                                          |                                              |                                          |
| <=26                    | 12,93 <del>69</del> ( <del>139</del> )     | 60,0 <del>5166</del> (38)                | 1,690, <del>721935</del> ( <del>9037</del> ) | 120,9 <del>6974</del> ( <del>649</del> ) |
| 27-30                   | 929 <del>35</del> ( <del>128</del> )       | 45,1 <del>6274</del> ( <del>329</del> )  | 1,378, <del>031188</del> ( <del>9230</del> ) | 68,49 <del>10</del> ( <del>528</del> )   |
| ≥31                     | 11,13 <del>47</del> ( <del>133</del> )     | 53,0 <del>6076</del> (34)                | 1,552, <del>18002</del> ( <del>9334</del> )  | 59,00 <del>923</del> (24)                |
| Unknown                 | 4 ( <del>&lt;1</del> )                     | 12 ( <del>4&lt;1</del> )                 | 265 ( <del>83&lt;1</del> )                   | 39 ( <del>12&lt;1</del> )                |

250642012

| <b>Maternal education (years)</b>                    |               |                |                        |                |
|------------------------------------------------------|---------------|----------------|------------------------|----------------|
| Low (≤9)                                             | 16,3469 (149) | 72,58398 (346) | 2,006,475645<br>(9043) | 146,2207 (759) |
| Middle (10-14)                                       | 87705 (126)   | 45,00718 (328) | 1,2967,875059<br>(928) | 52,0457 (421)  |
| High (≥15)                                           | 5600 (17)     | 28,1230 (318)  | 908,327454<br>(9320)   | 36,363 (415)   |
| Unknown                                              | 2651 (18)     | 12,57582 (38)  | 409,342410 (93)        | 13,88990 (36)  |
| <b>Maternal smoking during pregnancy<sup>†</sup></b> |               |                |                        |                |
| Yes                                                  | 47556 (122)   | 21,25460 (318) | 633,618236<br>(194)    | 10,9357 (21)   |
| No                                                   | 14,6617 (612) | 85,12230 (73)  | 2,419,740935<br>(9574) | 32,3035 (61)   |
| Unknown                                              | 23985 (11)    | 95147 (48)     | 222,589604<br>(917)    | 9968 (419)     |

\* Value is n (%). Study population includes all 5,0961,18798 singletons born in Denmark 1978-2006 and born in Sweden 1973-2006.

<sup>†</sup> Smoking status is available for 1991-2006 in Denmark and for 1983-2006 in Sweden.

Formatted: Don't hyphenate, Tab stops: 0", Left

250642012

Table 2. Hazard Ratios (HRs) for childhood cancer according to the Apgar score at 5 minutes.

| Apgar score         | Cases (rate per 1000) | Crude HR                               | Adjusted HR (95%CI) *                     |
|---------------------|-----------------------|----------------------------------------|-------------------------------------------|
| 0                   | 3 (0.7)               | 0.474 (0.154-1.4536) <sup>‡</sup>      | 0.5647 (0.185-1.7345) <sup>‡</sup>        |
| 1                   | 15 (2.9)              | 2.4428 (1.4738-43.0478) <sup>‡</sup>   | 2.1720 (1.312-3.605) <sup>‡‡</sup>        |
| 2                   | 67 (1.923)            | 1.8947 (0.61-3.54)                     | 1.7244 (0.7760-3.8245)                    |
| 3                   | 911 (2.16)            | 1.85213 (0.96118-3.5684) <sup>‡</sup>  | 1.67206 (0.8714-3.2172) <sup>‡</sup>      |
| 4                   | 14 (2.2)              | 1.6152 (0.9488-2.7861)                 | 1.4848 (0.866-2.5554)                     |
| 5                   | 216 (2.15)            | 1.4065 (0.9111-2.1844) <sup>‡</sup>    | 1.3262 (0.8510-2.0540) <sup>‡</sup>       |
| <i>0-5 combined</i> | <i>6876 (2.03)</i>    | <i>1.547 (1.215-1.968)<sup>‡</sup></i> | <i>1.4656 (1.1523-1.8996)<sup>‡</sup></i> |
| 6                   | 2834 (1.58)           | 1.0317 (0.7184-1.4964)                 | 0.9515 (0.6682-1.3834)                    |
| 7                   | 617 (1.68)            | 1.1507 (0.9984-1.347)                  | 1.005 (0.7782-1.2934)                     |

Formatted Table

Formatted: Superscript

Formatted: Font: Italic

Formatted: Font: Italic

250642012

|              |                        |                                             |                                                      |
|--------------|------------------------|---------------------------------------------|------------------------------------------------------|
| 8            | <u>177208 (1.72-)</u>  | <u>1.1826 (1.0810-1.2945)<sup>‡</sup></u>   | <u>1.0823 (0.9307-</u><br><u>1.2642)<sup>‡</sup></u> |
| 6-8 combined | <u>266309 (1.72-0)</u> | <u>1.1221 (0.991-07-1.2735)<sup>‡</sup></u> | <u>1.0518 (0.9205-</u><br><u>1.1832)<sup>‡</sup></u> |
| 9-10         | <u>7216765 (1.67)</u>  | <u>1.0 (ref)</u>                            | <u>1.0 (ref)</u>                                     |

\* Adjusted for country, sex, and maternal factors at child birth (age, education, and smoking during pregnancy).

<sup>‡</sup>Adjusted for country, sex, maternal factors at child birth (age, education, and smoking during pregnancy), and birth characteristics of the child (birth weight, gestational age, birth order).

<sup>‡</sup> P<0.05.

**Table 3. Hazard Ratios (HRs) for childhood cancer according to the Apgar score at 5 minutes, by age at diagnosis.**

| <u>Age at diagnosis</u> | <u>The Apgar score</u> | <u>Cases (rate, ‰)</u> | <u>Crude HR (95% CI)</u>             | <u>Adjusted HR (95% CI)<sup>*</sup></u> |
|-------------------------|------------------------|------------------------|--------------------------------------|-----------------------------------------|
| <u>Under 6 months</u>   |                        |                        |                                      |                                         |
|                         | <u>0-5</u>             | <u>20 (0.6)</u>        | <u>6.65 (4.15-10.65)<sup>†</sup></u> | <u>6.04 (3.73-9.76)<sup>†</sup></u>     |
|                         | <u>6-8</u>             | <u>39 (0.2)</u>        | <u>2.43 (1.73-3.39)<sup>†</sup></u>  | <u>2.17 (1.54-3.05)<sup>†</sup></u>     |
|                         | <u>9-10</u>            | <u>465 (0.1)</u>       | <u>1.0 (ref)</u>                     | <u>1.0 (ref)</u>                        |
| <u>6 months-5 years</u> |                        |                        |                                      |                                         |
|                         | <u>0-5</u>             | <u>25 (0.9)</u>        | <u>1.21 (0.82-1.79)</u>              | <u>1.18 (0.80-1.76)</u>                 |

250642012

|                     |             |                   |                         |                         |
|---------------------|-------------|-------------------|-------------------------|-------------------------|
|                     | <u>6-8</u>  | <u>134 (0.9)</u>  | <u>1.15 (0.97-1.36)</u> | <u>1.09 (0.92-1.30)</u> |
|                     | <u>9-10</u> | <u>3678 (0.8)</u> | <u>1.0 (ref)</u>        | <u>1.0 (ref)</u>        |
| <u>&gt; 5 years</u> |             |                   |                         |                         |
|                     | <u>0-5</u>  | <u>23 (1.0)</u>   | <u>1.17 (0.78-1.77)</u> | <u>1.10 (0.73-1.65)</u> |
|                     | <u>6-8</u>  | <u>93(0.7)</u>    | <u>0.89 (0.73-1.10)</u> | <u>0.83 (0.67-1.02)</u> |
|                     | <u>9-10</u> | <u>3223 (0.8)</u> | <u>1.0 (ref)</u>        | <u>1.0 (ref)</u>        |

\*Adjusted for country, sex, maternal factors at child birth (age, education, and smoking during pregnancy), and birth characteristics of the child (birth weight, gestational age, and birth order).

† P<0.05.

250642012

**Table 3. Hazard Ratios (HRs) for childhood cancer according to the Apgar score at 5 minutes, stratified on country, birth characteristics and maternal variables.**

| <b>Variable</b>    |            | <b>Apgar score</b> | <b>Cancer cases (rate, per 1000)</b> | <b>Crude HR<sup>‡</sup> (95% CI)</b> | <b>Adjusted HR<sup>‡</sup> (95% CI)</b> |                               |
|--------------------|------------|--------------------|--------------------------------------|--------------------------------------|-----------------------------------------|-------------------------------|
| <b>Country</b>     | Denmark    | 1-5                | 20 (1.9)                             | 1.57 (1.25-1.98) <sup>‡</sup>        | 1.52 (1.23-1.91) <sup>‡</sup>           |                               |
|                    |            | 6-8                | 72 (1.7)                             | 1.21 (1.07-1.35) <sup>‡</sup>        | 1.16 (1.03-1.30) <sup>‡</sup>           |                               |
|                    |            | 9-10               | 2461 (1.5)                           | 1.0 (ref)                            | 1.0 (ref)                               |                               |
|                    | Sweden     | 1-5                | 56 (2.5)                             | 1.65 (1.26-2.15) <sup>‡</sup>        | 1.60 (1.23-2.09) <sup>‡</sup>           |                               |
|                    |            | 6-8                | 237 (2.0)                            | 1.26 (1.06-1.38) <sup>‡</sup>        | 1.16 (1.02-1.33) <sup>‡</sup>           |                               |
|                    |            | 9-10               | 5304 (1.8)                           | 1.0 (ref)                            | 1.0 (ref)                               |                               |
|                    | <b>Sex</b> | Male               | 1-5                                  | 44 (2.6)                             | 1.54 (1.13-2.08) <sup>‡</sup>           | 1.46 (1.07-1.99) <sup>‡</sup> |
|                    |            |                    | 6-8                                  | 169 (1.9)                            | 1.09 (0.94-1.28)                        | 1.04 (0.89-1.22)              |
|                    |            |                    | 9-10                                 | 4232 (1.8)                           | 1.0 (ref)                               | 1.0 (ref)                     |
| Female             |            | 1-5                | 32 (2.5)                             | 1.60 (1.12-2.29) <sup>‡</sup>        | 1.55 (1.08-2.23) <sup>‡</sup>           |                               |
|                    |            | 6-8                | 140 (2.0)                            | 1.35 (1.14-1.60) <sup>‡</sup>        | 1.29 (1.09-1.53) <sup>‡</sup>           |                               |
|                    |            | 9-10               | 3533 (1.6)                           | 1.0 (ref)                            | 1.0 (ref)                               |                               |
| <b>Birth order</b> | 1          | 1-5                | 38 (2.5)                             | 1.45 (1.04-2.02) <sup>‡</sup>        | 1.38 (0.99-1.93)                        |                               |



2506+2012

|                        |           |            |                               |                               |
|------------------------|-----------|------------|-------------------------------|-------------------------------|
|                        | 6-8       | 174 (2.0)  | 1.14 (0.98-1.33)              | 1.10 (0.94-1.28)              |
|                        | 9-10      | 3385 (1.6) | 1.0 (ref)                     | 1.0 (ref)                     |
| 2                      | 1-5       | 16 (1.7)   | 1.28 (0.78-2.09)              | 1.18 (0.72-1.93)              |
|                        | 6-8       | 72 (1.7)   | 1.08 (0.85-1.36)              | 0.99 (0.78-1.26)              |
|                        | 9-10      | 2797 (1.7) | 1.0 (ref)                     | 1.0 (ref)                     |
| 3                      | 1-5       | 16 (2.8)   | 2.11 (1.29-3.46) <sup>‡</sup> | 2.13 (1.29-3.49) <sup>‡</sup> |
|                        | 6-8       | 59 (2.6)   | 1.63 (1.26-2.12) <sup>‡</sup> | 1.60 (1.23-2.09) <sup>‡</sup> |
|                        | 9-10      | 1480 (1.7) | 1.0 (ref)                     | 1.0 (ref)                     |
| <b>Gestational age</b> | <37 weeks | 1-5        | 17 (1.9)                      | 1.53 (1.16-2.00) <sup>‡</sup> |
|                        |           | 6-8        | 63 (2.6)                      | 1.16 (1.02-1.32) <sup>‡</sup> |
|                        |           | 9-10       | 353 (1.8)                     | 1.0 (ref)                     |
|                        | ≥37 weeks | 1-5        | 57 (2.5)                      | 1.74 (1.07-2.84) <sup>‡</sup> |
|                        |           | 6-8        | 244 (1.9)                     | 1.34 (1.02-1.75) <sup>‡</sup> |
|                        |           | 9-10       | 7304 (1.7)                    | 1.0 (ref)                     |
| <b>Birth weight</b>    | <2500 g   | 1-5        | 13 (1.6)                      | 1.65 (0.94-2.88)              |
|                        |           | 6-8        | 46 (2.0)                      | 1.32 (0.96-1.81)              |
|                        |           | 9-10       | 235 (1.7)                     | 1.0 (ref)                     |

2506+2012

|                     |       |            |                               |                               |
|---------------------|-------|------------|-------------------------------|-------------------------------|
| 2500-3249g          | 1-5   | 18 (2.3)   | 1.54 (0.95-2.48)              | 1.50 (0.93-2.41)              |
|                     | 6-8   | 88 (2.2)   | 1.39 (1.12-1.73) <sup>‡</sup> | 1.33 (1.07-1.66) <sup>‡</sup> |
|                     | 9-10  | 1802 (1.6) | 1.0 (ref)                     | 1.0 (ref)                     |
| 3250-3999g          | 1-5   | 28 (2.5)   | 1.56 (1.07-2.28) <sup>‡</sup> | 1.51 (1.04-2.21) <sup>‡</sup> |
|                     | 6-8   | 126 (1.9)  | 1.20 (1.00-1.43) <sup>‡</sup> | 1.15 (0.96-1.37)              |
|                     | 9-10  | 4079 (1.7) | 1.0 (ref)                     | 1.0 (ref)                     |
| ≥4000-g             | 1-5   | 10 (2.3)   | 1.22 (0.63-2.34)              | 1.18 (0.61-2.26)              |
|                     | 6-8   | 44 (1.6)   | 0.89 (0.66-1.20)              | 0.86 (0.63-1.16)              |
|                     | 9-10  | 1536 (1.8) | 1.0 (ref)                     | 1.0 (ref)                     |
| <b>Maternal age</b> | ≤26   | 1-5        | 30 (2.3)                      | 1.50 (1.04-2.18) <sup>‡</sup> |
|                     | 6-8   | 114 (1.9)  | 1.09 (0.90-1.31)              | 1.03 (0.85-1.25)              |
|                     | 9-10  | 3051 (1.8) | 1.0 (ref)                     | 1.0 (ref)                     |
|                     | 27-30 | 1-5        | 24 (2.6)                      | 1.73 (1.14-2.64) <sup>‡</sup> |
|                     | 6-8   | 101 (2.2)  | 1.42 (1.16-1.73) <sup>‡</sup> | 1.39 (1.13-1.70) <sup>‡</sup> |
|                     | 9-10  | 2271 (1.6) | 1.0 (ref)                     | 1.0 (ref)                     |
|                     | ≥31   | 1-5        | 22 (2.0)                      | 1.53 (1.01-2.33) <sup>‡</sup> |
|                     | 6-8   | 94 (1.8)   | 1.17 (0.95-1.44)              | 1.08 (0.87-1.33)              |

250612012

|                           |        |      |            |                               |                               |
|---------------------------|--------|------|------------|-------------------------------|-------------------------------|
|                           |        | 9-10 | 2443 (1.6) | 1.0 (ref)                     | 1.0 (ref)                     |
| <b>Maternal education</b> | Low    | 1-5  | 43 (2.6)   | 1.77 (1.30-2.39) <sup>‡</sup> | 1.67 (1.23-2.27) <sup>‡</sup> |
|                           |        | 6-8  | 164 (2.3)  | 1.27 (1.08-1.49) <sup>‡</sup> | 1.20 (1.03-1.41) <sup>‡</sup> |
|                           |        | 9-10 | 3692 (1.8) | 1.0 (ref)                     | 1.0 (ref)                     |
|                           | Middle | 1-5  | 17 (1.9)   | 1.30 (0.80-2.13)              | 1.25 (0.76-2.06)              |
|                           |        | 6-8  | 62 (1.4)   | 0.88 (0.68-1.13)              | 0.84 (0.65-1.08)              |
|                           |        | 9-10 | 2155 (1.7) | 1.0 (ref)                     | 1.0 (ref)                     |
|                           | High   | 1-5  | 8 (1.4)    | 1.57 (1.22-2.02) <sup>‡</sup> | 1.48 (1.15-1.92) <sup>‡</sup> |
|                           |        | 6-8  | 64 (2.3)   | 0.97 (0.46-2.04)              | 0.95 (0.45-2.01)              |
|                           |        | 9-10 | 1357 (1.5) | 1.0 (ref)                     | 1.0 (ref)                     |
| <b>Maternal smoking</b>   | Yes    | 1-5  | 6 (1.3)    | 0.89 (0.40-1.99)              | 0.86 (0.38-1.92)              |
|                           |        | 6-8  | 48 (2.3)   | 1.36 (1.02-1.82) <sup>‡</sup> | 1.28 (0.96-1.72)              |
|                           |        | 9-10 | 1074 (1.7) | 1.0 (ref)                     | 1.0 (ref)                     |
|                           | No     | 1-5  | 40 (2.7)   | 2.10 (1.53-2.88) <sup>‡</sup> | 2.07 (1.51-2.85) <sup>‡</sup> |
|                           |        | 6-8  | 144 (1.7)  | 1.17 (0.99-1.38)              | 1.10 (0.93-1.30)              |
|                           |        | 9-10 | 3629 (1.5) | 1.0 (ref)                     | 1.0 (ref)                     |

\*Crude analysis.

1  
2  
3  
4  
5  
6  
7  
8  
9  
10  
11  
12  
13  
14  
15  
16  
17  
18  
19  
20  
21  
22  
23  
24  
25  
26  
27  
28  
29  
30  
31  
32  
33  
34  
35  
36  
37  
38  
39  
40  
41  
42  
43  
44  
45  
46  
47  
48  
49

2506+2012

†Adjusted for country, sex, maternal factors (age, education, and smoking during pregnancy), and birth characteristics of the child (birth weight, gestational age, and birth order).

‡P<0.05.

For peer review only

250642012

Table 4. Hazard Ratios (HRs) for main childhood cancers according to the Apgar score at 5 minutes

| Cancer type                    | Apgar score | Cancer cases (rate per 1000) | Crude HR (95% CI)                             | Adjusted HR <sup>†*</sup> (95% CI) |
|--------------------------------|-------------|------------------------------|-----------------------------------------------|------------------------------------|
| Leukemia                       | 0-5         | 13 (0.4)                     | <del>10.093</del> (0.6054-1.7964)             | <del>10.0598</del> (0.6157-1.8169) |
|                                | 6-8         | <del>7185</del> (0.5)        | <del>1.0213</del> (0.891-1.2941) <sup>‡</sup> | <del>1.0215</del> (0.8093-1.2943)  |
|                                | 9-10        | <del>2122314</del> (0.5)     | 1.0 (ref)                                     | 1.0 (ref)                          |
| Hodgkin's disease              | 0-5         | 0 (-)                        | -                                             | -                                  |
|                                | 6-8         | 2 (<0.05)                    | 0.49 (0.12-1.99)                              | 0.42 (0.10-1.71)                   |
|                                | 9-10        | 126 (<0.05)                  | 1.0 (ref)                                     | 1.0 (ref)                          |
| LymphomasNon-Hodgkin's disease | 0-5         | 3 (0.1)                      | <del>04.8412</del> (0.2736-23.6049)           | 0.973 (0.231-23.027)               |
|                                | 6-8         | 120 (0.1)                    | 0.629 (0.357-1.029)                           | 0.515 (0.29-04.9003)               |
|                                | 9-10        | <del>598449</del> (0.1)      | 1.0 (ref)                                     | 1.0 (ref)                          |
| CNS cancers                    | 0-5         | <del>2120</del> (0.66)       | 1.242 (0.786-)                                | 1.2218 (0.773-1.940)               |

2506+2012

|                       |      |                          |                                   |                                    |
|-----------------------|------|--------------------------|-----------------------------------|------------------------------------|
|                       |      |                          | <del>1.9896</del>                 |                                    |
|                       | 6-8  | <del>104104</del> (0.77) | <del>1.2934</del> (1.406-         | 1.269 (1.036-1.548)                |
|                       |      |                          | <del>1.5763</del> ) <sup>†‡</sup> | <sup>†‡</sup>                      |
|                       | 9-10 | <del>243245</del> (0.5)  | 1.0 (ref)                         | 1.0 (ref)                          |
| <b>Retinoblastoma</b> | 0-5  | 3 (0.1)                  | <del>2.2001</del> (0.7064-        | <del>2.0385</del> (0.6459-         |
|                       |      |                          | <del>6.8427</del> )               | <del>65.3980</del> )               |
|                       | 6-8  | <del>49</del> (<0.054)   | <del>0.5207</del> (0.1955-        | <del>0.4899</del> (0.1850-         |
|                       |      |                          | <del>12.3907</del> )              | 1.2893)                            |
|                       | 9-10 | <del>24063</del> (0.1)   | 1.0 (ref)                         | 1.0 (ref)                          |
| <b>Wilms' tumor</b>   | 0-5  | <del>124</del> (0.4)     | <del>4.6298</del> (2.6193-        | <del>4.3378</del> (2.4279-         |
|                       |      |                          | <del>8.2047</del> ) <sup>†‡</sup> | <del>78.7349</del> ) <sup>†‡</sup> |
|                       | 6-8  | <del>1820</del> (0.1)    | <del>1.247</del> (0.7781-         | <del>1.1622</del> (0.728-          |
|                       |      |                          | 1.99)                             | 1.8794)                            |
|                       | 9-10 | <del>4484</del> (0.1)    | 1.0 (ref)                         | 1.0 (ref)                          |
| <b>Hepatoblastoma</b> | 0-5  | <del>12</del> (<0.054)   | <del>13.7824</del> (0.2580-       | <del>12.5164</del> (0.2165-        |
|                       |      |                          | <del>123.7612</del> )             | 10.986)                            |
|                       | 6-8  | <del>45</del> (<0.05)    | <del>1.2744</del> (0.4759-        | <del>1.0622</del> (0.349-          |

2506+2012

|                          |      |                          |                            |                             |
|--------------------------|------|--------------------------|----------------------------|-----------------------------|
|                          |      |                          | 3.4453)                    | 23.902)                     |
|                          | 9-10 | <del>96107</del> (<0.05) | 1.0 (ref)                  | 1.0 (ref)                   |
| <b>Bone cancer</b>       | 0-5  | 3 (0.1)                  | 2.2500 (0.7264-<br>76.023) | 21.0587 (0.650-<br>65.4588) |
|                          | 6-8  | <del>67</del> (<0.05)    | 0.858 (0.3841-<br>1.9086)  | 0.7985 (0.3540-<br>1.802)   |
|                          | 9-10 | 22048 (0.1)              | 1.0 (ref)                  | 1.0 (ref)                   |
| <b>Testicular cancer</b> | 0-5  | 0 (0)                    | -                          | -                           |
|                          | 6-8  | <del>45</del> (<0.05)    | 2.0844 (0.7698-<br>56.075) | 12.8915 (0.686-<br>5.425)   |
|                          | 9-10 | <del>5964</del> (<0.05)  | 1.0 (ref)                  | 1.0 (ref)                   |

\* Adjusted for country, sex, maternal factors at child birth (age, education, and smoking during pregnancy), and birth characteristics of the child (birth weight, gestational age, birth order).

† P<0.05.

\* Adjusted for country, sex, and maternal factors at child birth (age, education, and smoking during pregnancy).

† Adjusted for country, sex, and maternal factors at child birth (age, education, and smoking during pregnancy), and birth characteristics of the child (birth weight, gestational age, and birth order).

‡ P<0.05.

1  
2  
3  
4  
5  
6  
7  
8  
9  
10  
11  
12  
13  
14  
15  
16  
17  
18  
19  
20  
21  
22  
23  
24  
25  
26  
27  
28  
29  
30  
31  
32  
33  
34  
35  
36  
37  
38  
39  
40  
41  
42  
43  
44  
45  
46  
47  
48  
49

| [250642012](#)

For peer review only

37



**STROBE 2007 (v4) checklist of items to be included in reports of observational studies in epidemiology\***  
**Checklist for cohort, case-control, and cross-sectional studies (combined)**

| Section/Topic             | Item # | Recommendation                                                                                                                                                                                                                                                                                                                                                                                                                                                         | Reported on page # |
|---------------------------|--------|------------------------------------------------------------------------------------------------------------------------------------------------------------------------------------------------------------------------------------------------------------------------------------------------------------------------------------------------------------------------------------------------------------------------------------------------------------------------|--------------------|
| Title and abstract        | 1      | (a) Indicate the study's design with a commonly used term in the title or the abstract                                                                                                                                                                                                                                                                                                                                                                                 | 1                  |
|                           |        | (b) Provide in the abstract an informative and balanced summary of what was done and what was found                                                                                                                                                                                                                                                                                                                                                                    | 2                  |
| <b>Introduction</b>       |        |                                                                                                                                                                                                                                                                                                                                                                                                                                                                        |                    |
| Background/rationale      | 2      | Explain the scientific background and rationale for the investigation being reported                                                                                                                                                                                                                                                                                                                                                                                   | 3                  |
| Objectives                | 3      | State specific objectives, including any pre-specified hypotheses                                                                                                                                                                                                                                                                                                                                                                                                      | 3                  |
| <b>Methods</b>            |        |                                                                                                                                                                                                                                                                                                                                                                                                                                                                        |                    |
| Study design              | 4      | Present key elements of study design early in the paper                                                                                                                                                                                                                                                                                                                                                                                                                | 4                  |
| Setting                   | 5      | Describe the setting, locations, and relevant dates, including periods of recruitment, exposure, follow-up, and data collection                                                                                                                                                                                                                                                                                                                                        | 4                  |
| Participants              | 6      | (a) <i>Cohort study</i> —Give the eligibility criteria, and the sources and methods of selection of participants. Describe methods of follow-up<br><i>Case-control study</i> —Give the eligibility criteria, and the sources and methods of case ascertainment and control selection. Give the rationale for the choice of cases and controls<br><i>Cross-sectional study</i> —Give the eligibility criteria, and the sources and methods of selection of participants | 4                  |
|                           |        | (b) <i>Cohort study</i> —For matched studies, give matching criteria and number of exposed and unexposed<br><i>Case-control study</i> —For matched studies, give matching criteria and the number of controls per case                                                                                                                                                                                                                                                 | Not applicable     |
| Variables                 | 7      | Clearly define all outcomes, exposures, predictors, potential confounders, and effect modifiers. Give diagnostic criteria, if applicable                                                                                                                                                                                                                                                                                                                               | 4,5                |
| Data sources/ measurement | 8*     | For each variable of interest, give sources of data and details of methods of assessment (measurement). Describe comparability of assessment methods if there is more than one group                                                                                                                                                                                                                                                                                   | 4,5                |
| Bias                      | 9      | Describe any efforts to address potential sources of bias                                                                                                                                                                                                                                                                                                                                                                                                              | 4                  |
| Study size                | 10     | Explain how the study size was arrived at                                                                                                                                                                                                                                                                                                                                                                                                                              | 4                  |
| Quantitative variables    | 11     | Explain how quantitative variables were handled in the analyses. If applicable, describe which groupings were chosen and why                                                                                                                                                                                                                                                                                                                                           | 5                  |
| Statistical methods       | 12     | (a) Describe all statistical methods, including those used to control for confounding                                                                                                                                                                                                                                                                                                                                                                                  | 5                  |
|                           |        | (b) Describe any methods used to examine subgroups and interactions                                                                                                                                                                                                                                                                                                                                                                                                    | 5                  |
|                           |        | (c) Explain how missing data were addressed                                                                                                                                                                                                                                                                                                                                                                                                                            | 5                  |
|                           |        | (d) <i>Cohort study</i> —If applicable, explain how loss to follow-up was addressed<br><i>Case-control study</i> —If applicable, explain how matching of cases and controls was addressed                                                                                                                                                                                                                                                                              | 4                  |

|                          |     |                                                                                                                                                                                                              |                |
|--------------------------|-----|--------------------------------------------------------------------------------------------------------------------------------------------------------------------------------------------------------------|----------------|
|                          |     | <i>Cross-sectional study</i> —If applicable, describe analytical methods taking account of sampling strategy                                                                                                 |                |
|                          |     | (e) Describe any sensitivity analyses                                                                                                                                                                        | Not applicable |
| <b>Results</b>           |     |                                                                                                                                                                                                              |                |
| Participants             | 13* | (a) Report numbers of individuals at each stage of study—eg numbers potentially eligible, examined for eligibility, confirmed eligible, included in the study, completing follow-up, and analysed            | 6              |
|                          |     | (b) Give reasons for non-participation at each stage                                                                                                                                                         | Not applicable |
|                          |     | (c) Consider use of a flow diagram                                                                                                                                                                           | Not applicable |
| Descriptive data         | 14* | (a) Give characteristics of study participants (eg demographic, clinical, social) and information on exposures and potential confounders                                                                     | 15,16          |
|                          |     | (b) Indicate number of participants with missing data for each variable of interest                                                                                                                          | 15,16          |
|                          |     | (c) <i>Cohort study</i> —Summarise follow-up time (eg, average and total amount)                                                                                                                             | 15,16          |
| Outcome data             | 15* | <i>Cohort study</i> —Report numbers of outcome events or summary measures over time                                                                                                                          | 6              |
|                          |     | <i>Case-control study</i> —Report numbers in each exposure category, or summary measures of exposure                                                                                                         | Not applicable |
|                          |     | <i>Cross-sectional study</i> —Report numbers of outcome events or summary measures                                                                                                                           | Not applicable |
| Main results             | 16  | (a) Give unadjusted estimates and, if applicable, confounder-adjusted estimates and their precision (eg, 95% confidence interval). Make clear which confounders were adjusted for and why they were included | 6, 15-25       |
|                          |     | (b) Report category boundaries when continuous variables were categorized                                                                                                                                    | 6,15-25        |
|                          |     | (c) If relevant, consider translating estimates of relative risk into absolute risk for a meaningful time period                                                                                             | 6,15-25        |
| Other analyses           | 17  | Report other analyses done—eg analyses of subgroups and interactions, and sensitivity analyses                                                                                                               | 15-25          |
| <b>Discussion</b>        |     |                                                                                                                                                                                                              |                |
| Key results              | 18  | Summarise key results with reference to study objectives                                                                                                                                                     | 7              |
| Limitations              | 19  | Discuss limitations of the study, taking into account sources of potential bias or imprecision. Discuss both direction and magnitude of any potential bias                                                   | 9              |
| Interpretation           | 20  | Give a cautious overall interpretation of results considering objectives, limitations, multiplicity of analyses, results from similar studies, and other relevant evidence                                   | 9              |
| Generalisability         | 21  | Discuss the generalisability (external validity) of the study results                                                                                                                                        | 9              |
| <b>Other information</b> |     |                                                                                                                                                                                                              |                |
| Funding                  | 22  | Give the source of funding and the role of the funders for the present study and, if applicable, for the original study on which the present article is based                                                | 9,10           |

\*Give information separately for cases and controls in case-control studies and, if applicable, for exposed and unexposed groups in cohort and cross-sectional studies.

**Note:** An Explanation and Elaboration article discusses each checklist item and gives methodological background and published examples of transparent reporting. The STROBE checklist is best used in conjunction with this article (freely available on the Web sites of PLoS Medicine at <http://www.plosmedicine.org/>, Annals of Internal Medicine at <http://www.annals.org/>, and Epidemiology at <http://www.epidem.com/>). Information on the STROBE Initiative is available at [www.strobe-statement.org](http://www.strobe-statement.org).
